# Supplementary material for: Circularly polarized luminescence and high photoluminescence quantum yields from rigid 5,10-dihydroindeno[2,1-a]indene and 2,2′-dialkoxy-1,1′-binaphthyl conjugates and copolymers
Source: Royal Society of Chemistry journal article supplement (doi:10.1039/d4ra00380b), 2024-01-01
Supplement: d4ra00380b1.pdf [file d4ra00380b1.pdf]

Electronic Supplementary Information

**Circularly Polarized Luminescence and High Photoluminescence Quantum Yields from Rigid Carbon-bridged Stilbene and 2,2'-Dialkoxy-1,1'-binaphthyl Conjugates and Co-polymers**

Keisuke Iwata,<sup>a</sup> Makoto Tsurui,<sup>b</sup> Kosuke Itaya,<sup>b</sup> Naoto Hamaguchi,<sup>a</sup> Yasunobu Egawa,<sup>a</sup> Yuichi Kitagawa,<sup>b</sup> Yasuchika Hasegawa<sup>b</sup> and Hayato Tsuji<sup>a\*</sup>

*a. Department of Chemistry, Faculty of Science, Kanagawa University, 3-27-1 Rokkaku-bashi, Kanagawa-ku, Yokohama 221-8686, Japan.*

*b. Faculty of Engineering, Hokkaido University, Kita13 Nishi8, Kita-ku, Sapporo 060-8628, Japan.*

**Contents**

|                                  |     |
|----------------------------------|-----|
| 1. Synthesis of precursors ..... | S2  |
| 2. NMR Charts .....              | S4  |
| 3. Calculations .....            | S18 |

## 1. Synthesis of precursors

**COPV1-(Bpin)<sub>2</sub>** A mixture of **COPV1-Br<sub>2</sub>** (157 mg, 0.374 mmol), bis(pinacolato)diboron (486.1 mg, 1.89 mmol), PdCl<sub>2</sub>(dppf)-CH<sub>2</sub>Cl<sub>2</sub> adduct (41.1 mg, 0.0411 mmol), and potassium acetate (398 mg, 3.74 mmol) in 1,4-dioxane (6 mL) were stirred at 80 °C for 16 h. Water was added to the mixture, which was then extracted with dichloromethane. The organic layer was dried with MgSO<sub>4</sub> and concentrated in vacuo. Silica gel column chromatography (eluent: hexane/dichloromethane = 3/2) afforded the title compound as a white solid (179 mg, 94%). Mp >300 °C. <sup>1</sup>H NMR (400 MHz, CDCl<sub>3</sub>, δ in ppm): 1.37 (s, 24H), 1.53 (s, 12H), 7.42 (d, *J* = 8.0 Hz, 2H), 7.79 (d, *J* = 8.0 Hz, 2H), 7.85 (s, 2H); <sup>13</sup>C{<sup>1</sup>H} NMR (100 MHz, CDCl<sub>3</sub>, δ in ppm): 158.6, 157.7, 141.2, 134.4, 128.2, 119.5, 84.1, 45.5, 25.3, 24.8. HRMS(APCI+) *m/z* calcd for C<sub>32</sub>H<sub>42</sub>B<sub>2</sub>O<sub>4</sub><sup>+</sup>([M<sup>+</sup>]): 512.3275, Found: 512.3276.

**CzCOPV1-Br.** To a microwave reactor purged with argon gas was charged with **COPV1-Br<sub>2</sub>** (997 mg, 2.38 mmol), carbazole (525 mg, 3.15 mmol), Pd<sub>2</sub>(dba)<sub>3</sub> (51 mg, 0.056 mmol), *t*-Bu<sub>3</sub>PHBF<sub>4</sub> (40 mg, 0.0 mmol), NaOt-Bu (557 mg, 5.8 mmol) and dry toluene (12 mL). The resulting mixture was stirred at 300 W and 140 °C for 3 min. After cooling to ambient temperature, the reaction mixture was passed through a short plug of silica gel. The solvent was removed under reduced pressure. The residue was purified on silica gel column chromatography (hexane/CH<sub>2</sub>Cl<sub>2</sub> = 10/3) to furnish the product (742 mg, 1.47 mmol, 66% yield) as a white solid. Mp 282.5-284 °C. <sup>1</sup>H NMR (400 MHz, CDCl<sub>3</sub>, δ in ppm): 8.13 (d, *J* = 7.7 Hz, 2H), 7.53 (d, *J* = 1.4 Hz, 1H), 7.44 (d, *J* = 7.7 Hz, 2H), 7.37-7.32 (m, 4H), 7.28 (t, *J* = 7.5 Hz, 2H), 7.18 (dd, *J* = 7.7, 1.8 Hz, 2H), 6.85 (d, *J* = 7.7 Hz, 1H), 1.29 (s, 6H), 1.26 (s, 6H). <sup>13</sup>C{<sup>1</sup>H} NMR (150 MHz, CDCl<sub>3</sub>, δ in ppm): 161.1, 160.9, 156.0, 155.5, 141.8, 137.0, 136.7, 135.3, 130.2, 126.3, 126.2, 126.0, 124.0, 121.5, 121.0, 120.8, 120.5, 120.4, 119.7, 110.2, 45.4, 45.3, 24.1. HRMS(APCI+) *m/z* calcd for C<sub>32</sub>H<sub>26</sub>BrN<sup>+</sup>([M<sup>+</sup>]): 503.1249, Found:503.1238.

**CzCOPV1-Bpin.** To a microwave reactor purged with argon gas was charged with **CzCOPV1-Br** (251 mg, 0.498 mmol), bis(pinacolato)diboron (189 mg, 0.746 mmol), Pd(OAc)<sub>2</sub> (15 mg, 6.7 × 10<sup>-3</sup> mmol), XPhos (48 mg, 0.101 mmol) and potassium acetate (155.6 mg, 1.58 mmol) in DMSO (5 mL). The mixture was stirred at 300 W and 110 °C for 3 min. Water was added to the mixture, which was then filtered to afford a crude product. Silica gel column chromatography (eluent: hexane/CH<sub>2</sub>Cl<sub>2</sub>= 1/2) afforded the title compound as a white solid (158 mg, 0.284 mmol, 57%). Mp >300 °C. <sup>1</sup>H NMR (400 MHz, CDCl<sub>3</sub>, δ in ppm) 8.17 (d, *J* = 7.7 Hz, 2H), 7.89 (s, 1H), 7.82 (dd, *J* = 7.2, 0.9 Hz, 1H), 7.58 (m, 2H), 7.50-7.40 (m, 6H), 7.32-7.28 (m, 3H), 1.62 (s, 6H), 1.59 (s, 6H), 1.39 (s, 12H). <sup>13</sup>C{<sup>1</sup>H}

NMR (150 MHz, CDCl<sub>3</sub>, δ in ppm): 161.4, 158.4, 157.2, 157.0, 141.6, 141.1, 137.4, 135.2, 134.5, 129.5, 128.7, 128.3, 126.4, 126.0, 123.8, 121.5, 120.8, 120.7, 120.3, 119.4, 110.4, 84.2, 45.8, 45.6, 25.4, 24.9. HRMS (APCI+) *m/z* calcd for C<sub>38</sub>H<sub>38</sub>BNO<sub>2</sub><sup>+</sup>([M<sup>+</sup>]): 551.3007, Found: 551.2997.



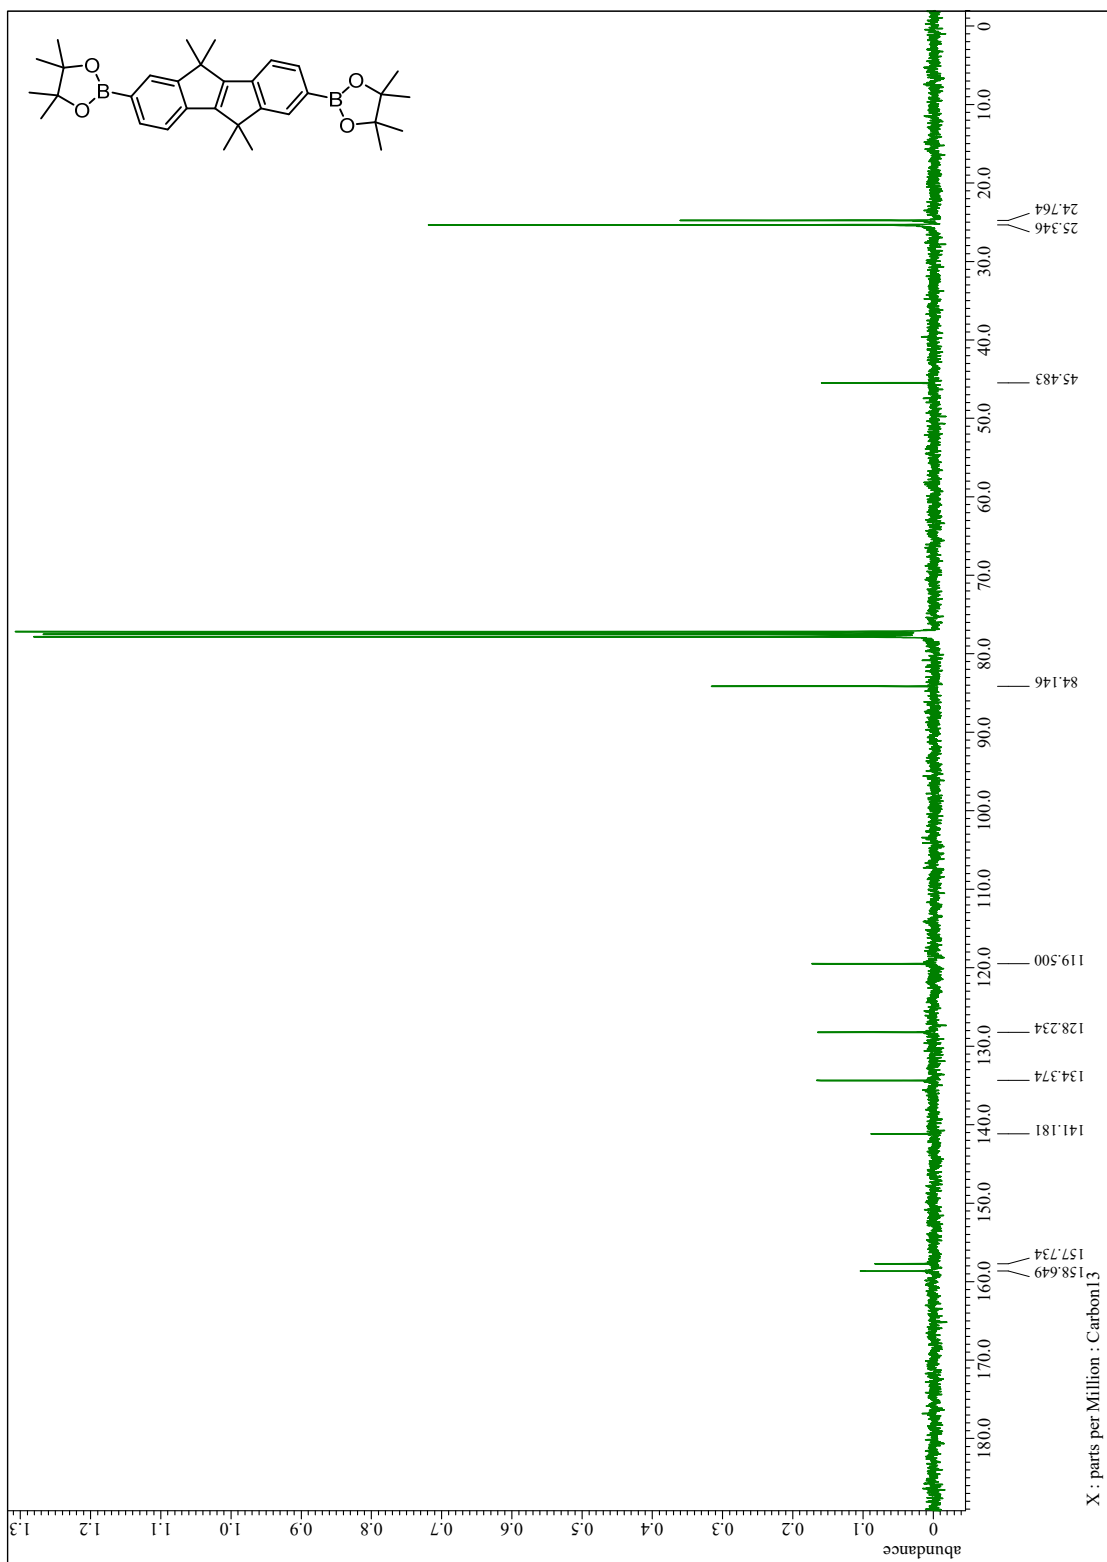

Figure S2.  $^{13}\text{C}$  NMR of COPV1-(Bpin) $_2$

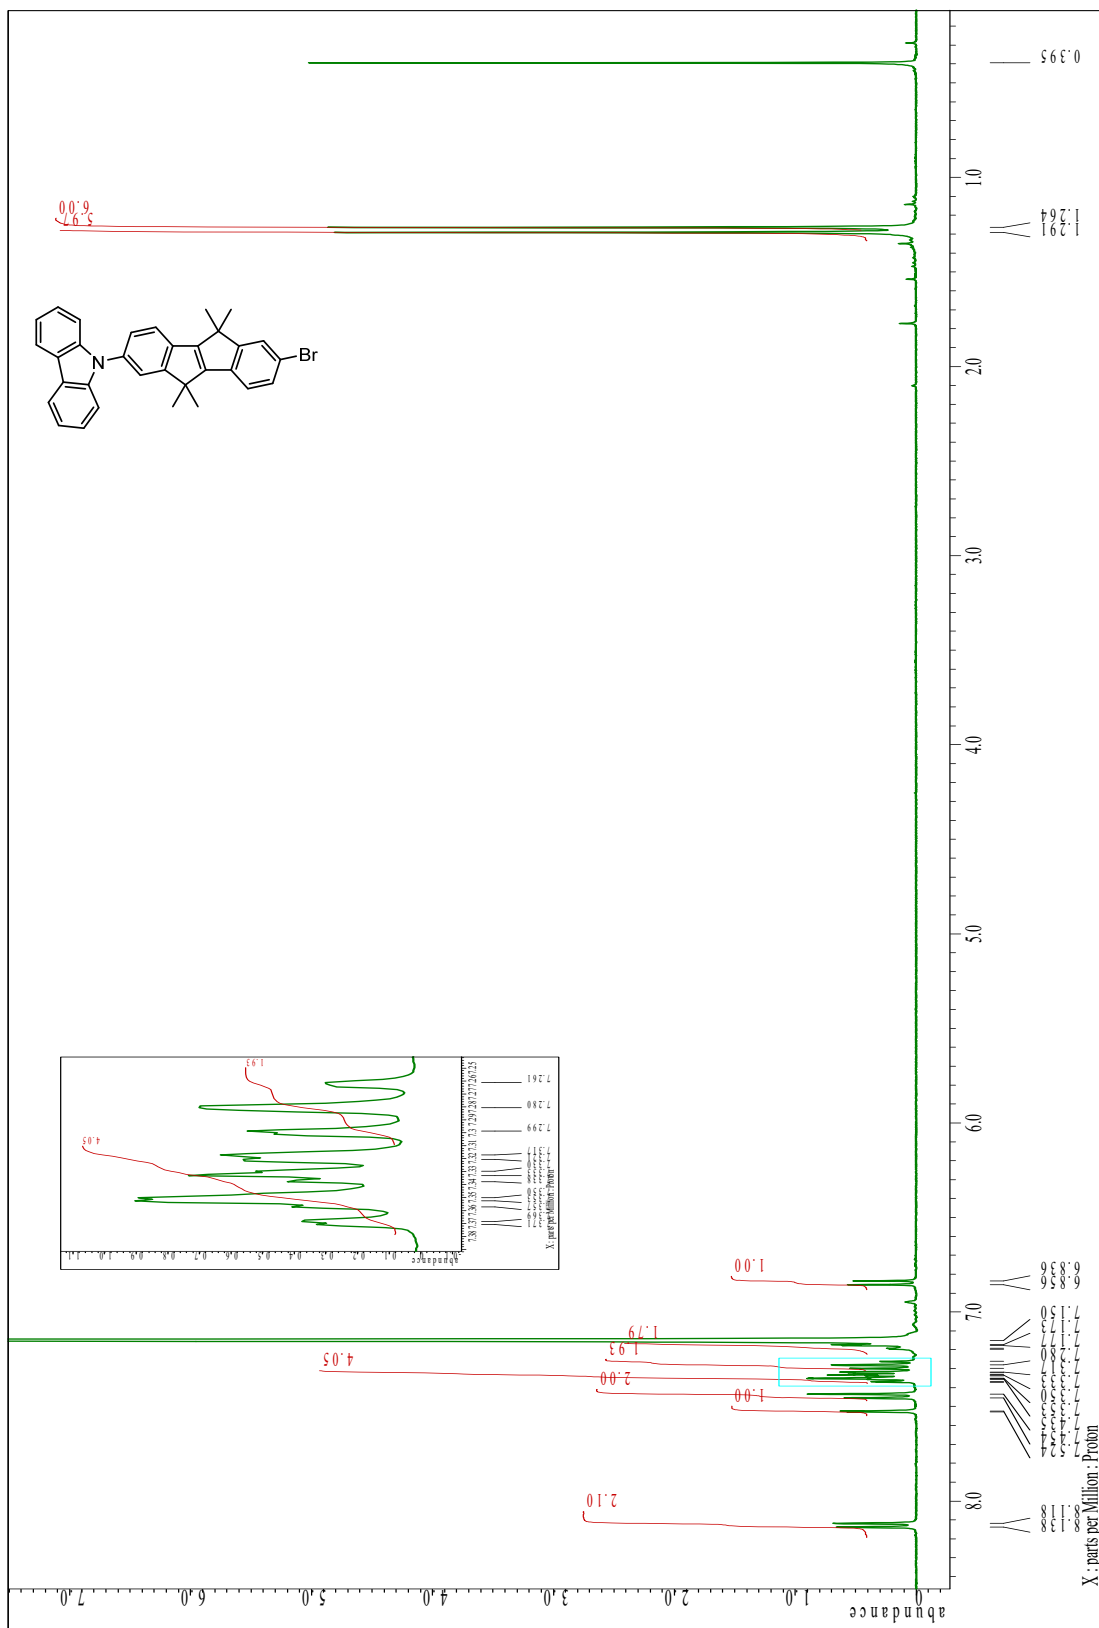

Figure S3.  $^1\text{H}$  NMR of Cz-COPV1-Br

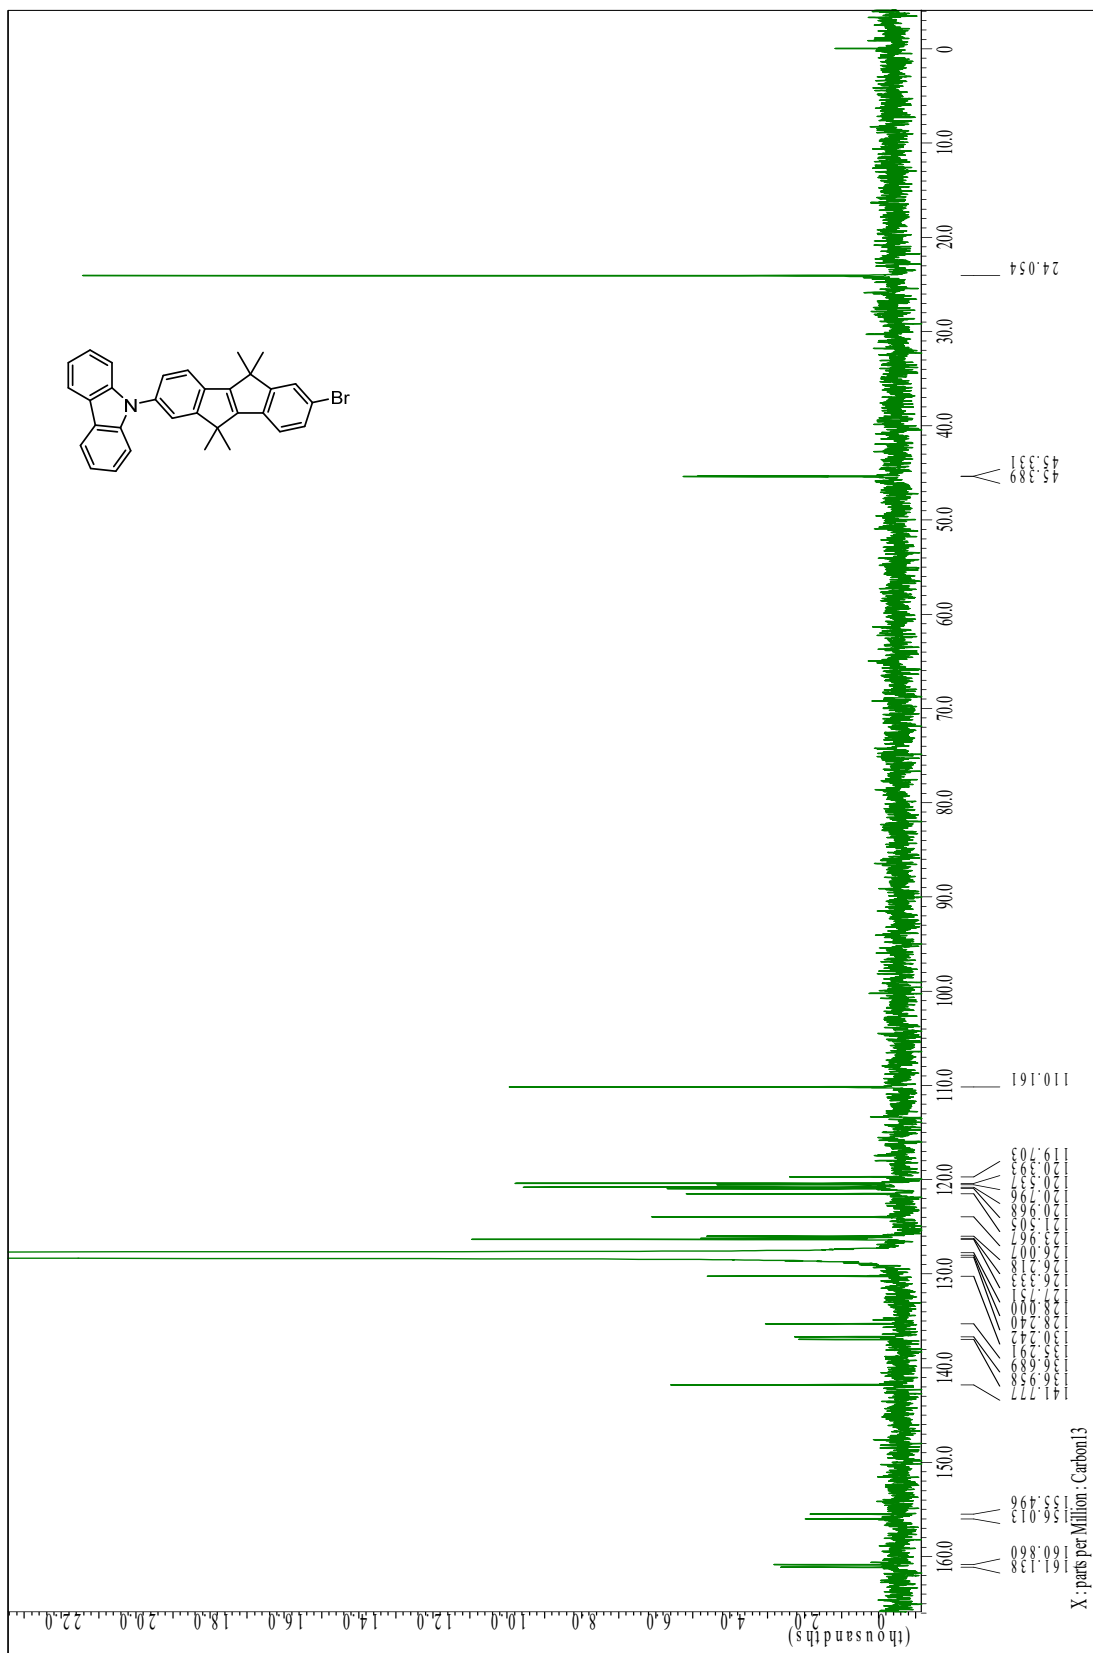

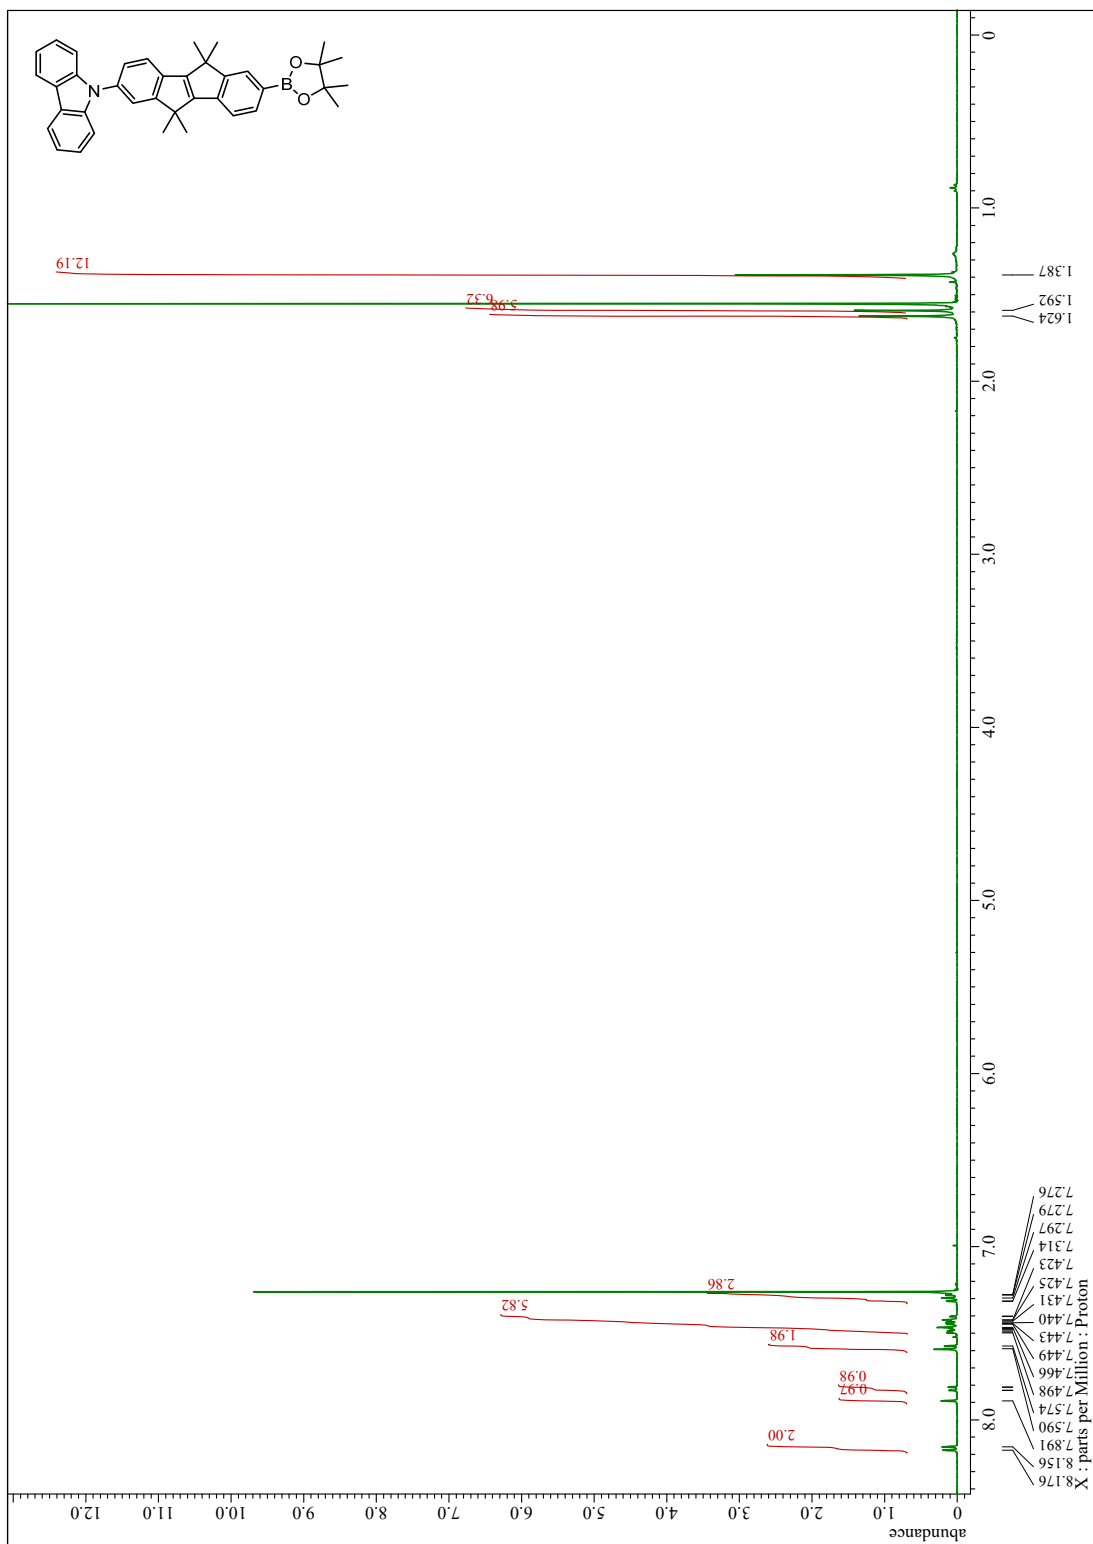

Figure S5.  $^1\text{H}$  NMR of Cz-COPV1-Bpin



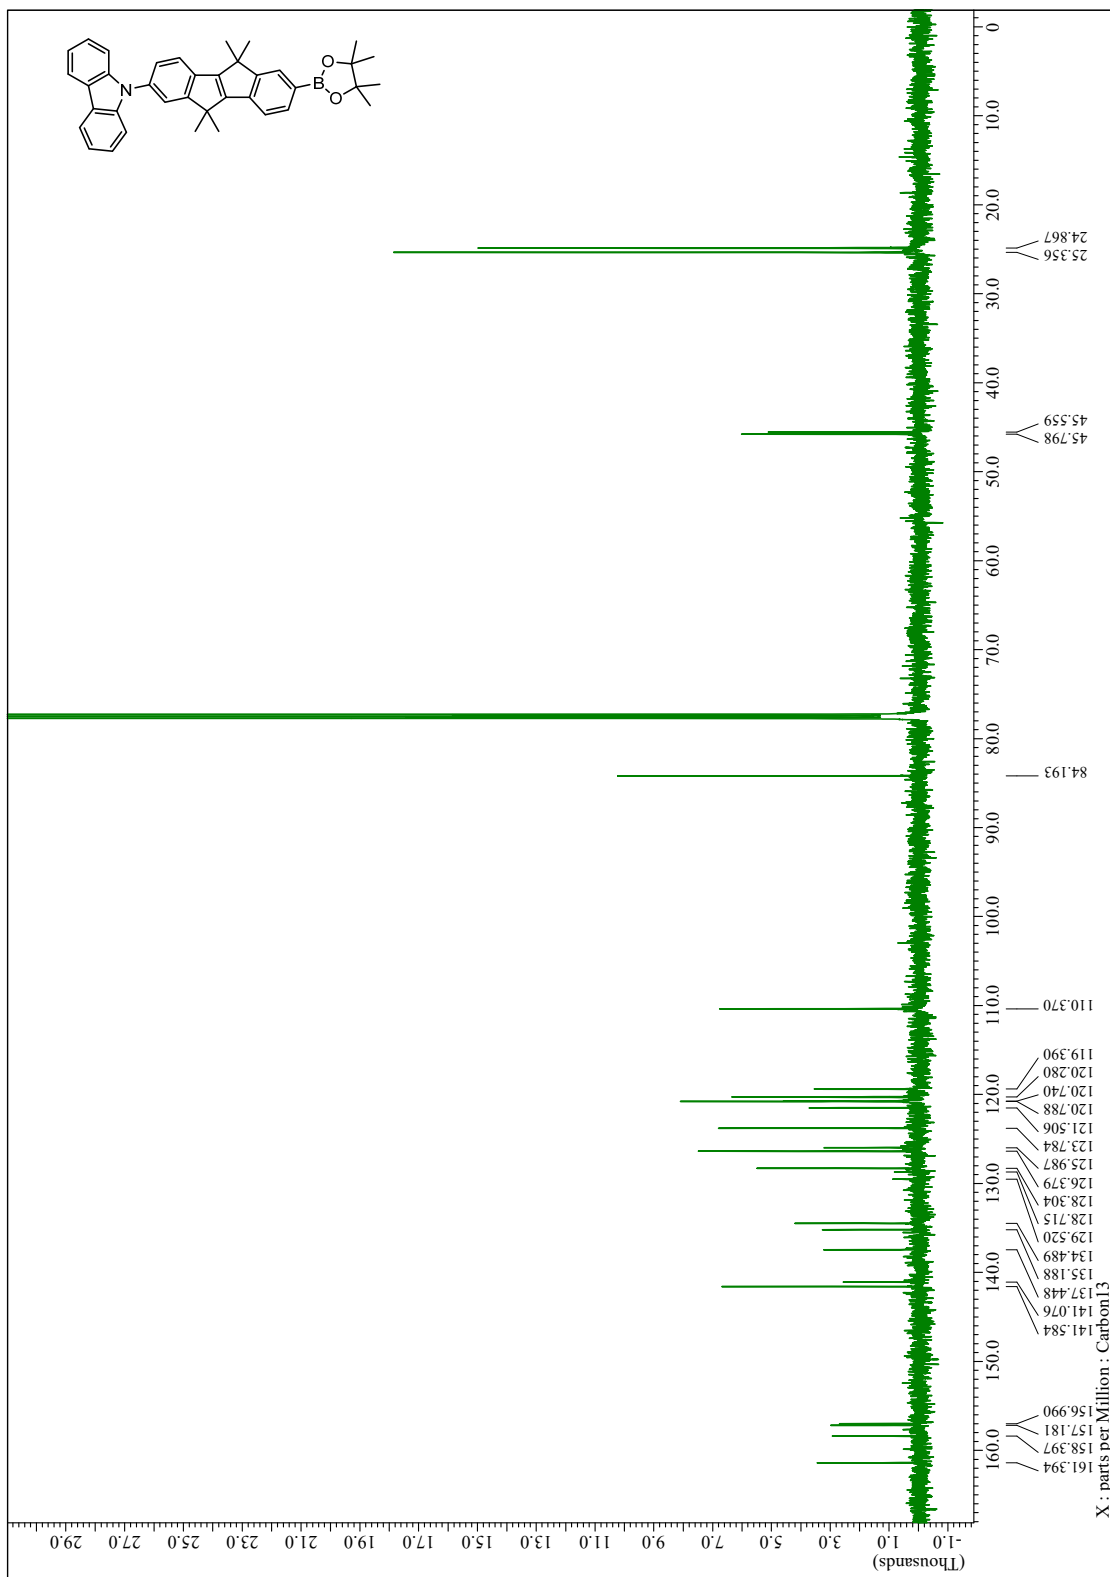

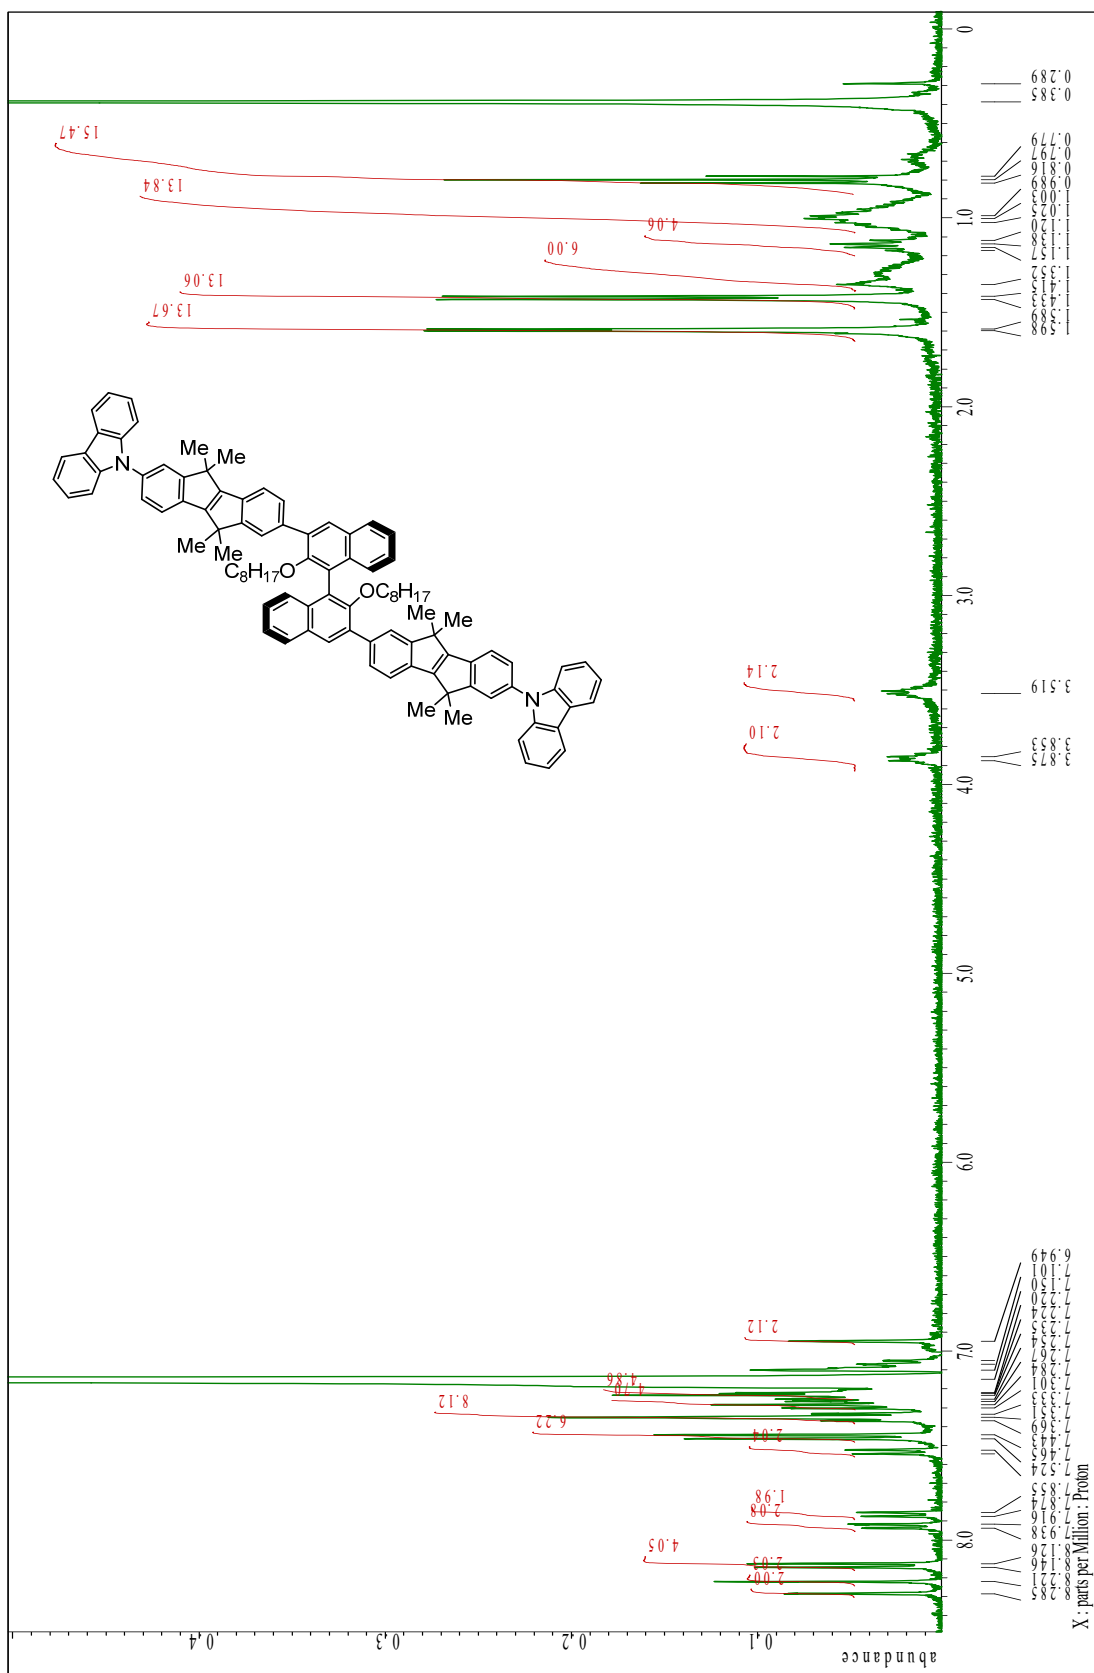

Figure S7. <sup>1</sup>H NMR of (S)-3,3'-(CzCOPV1)<sub>2</sub>-binaph

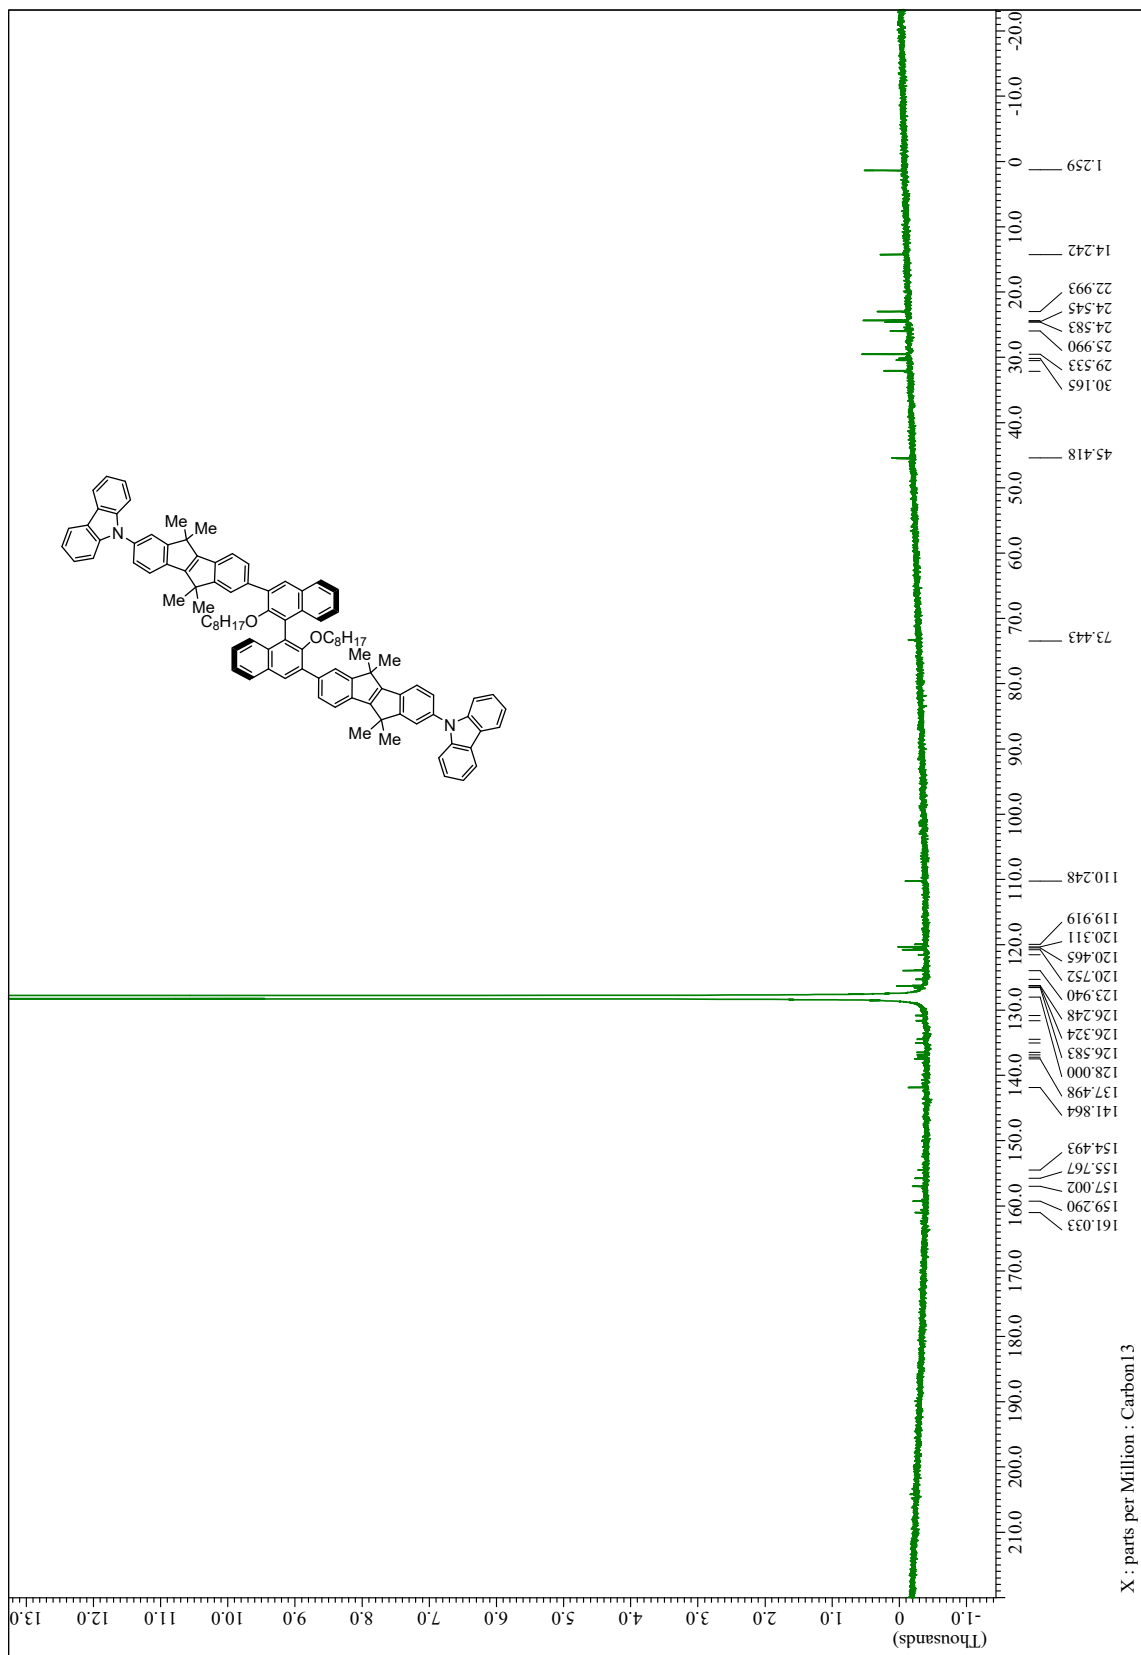

Figure S8. <sup>13</sup>C NMR of *(S)*-3,3'-(CzCOPV1)<sub>2</sub>-binaph

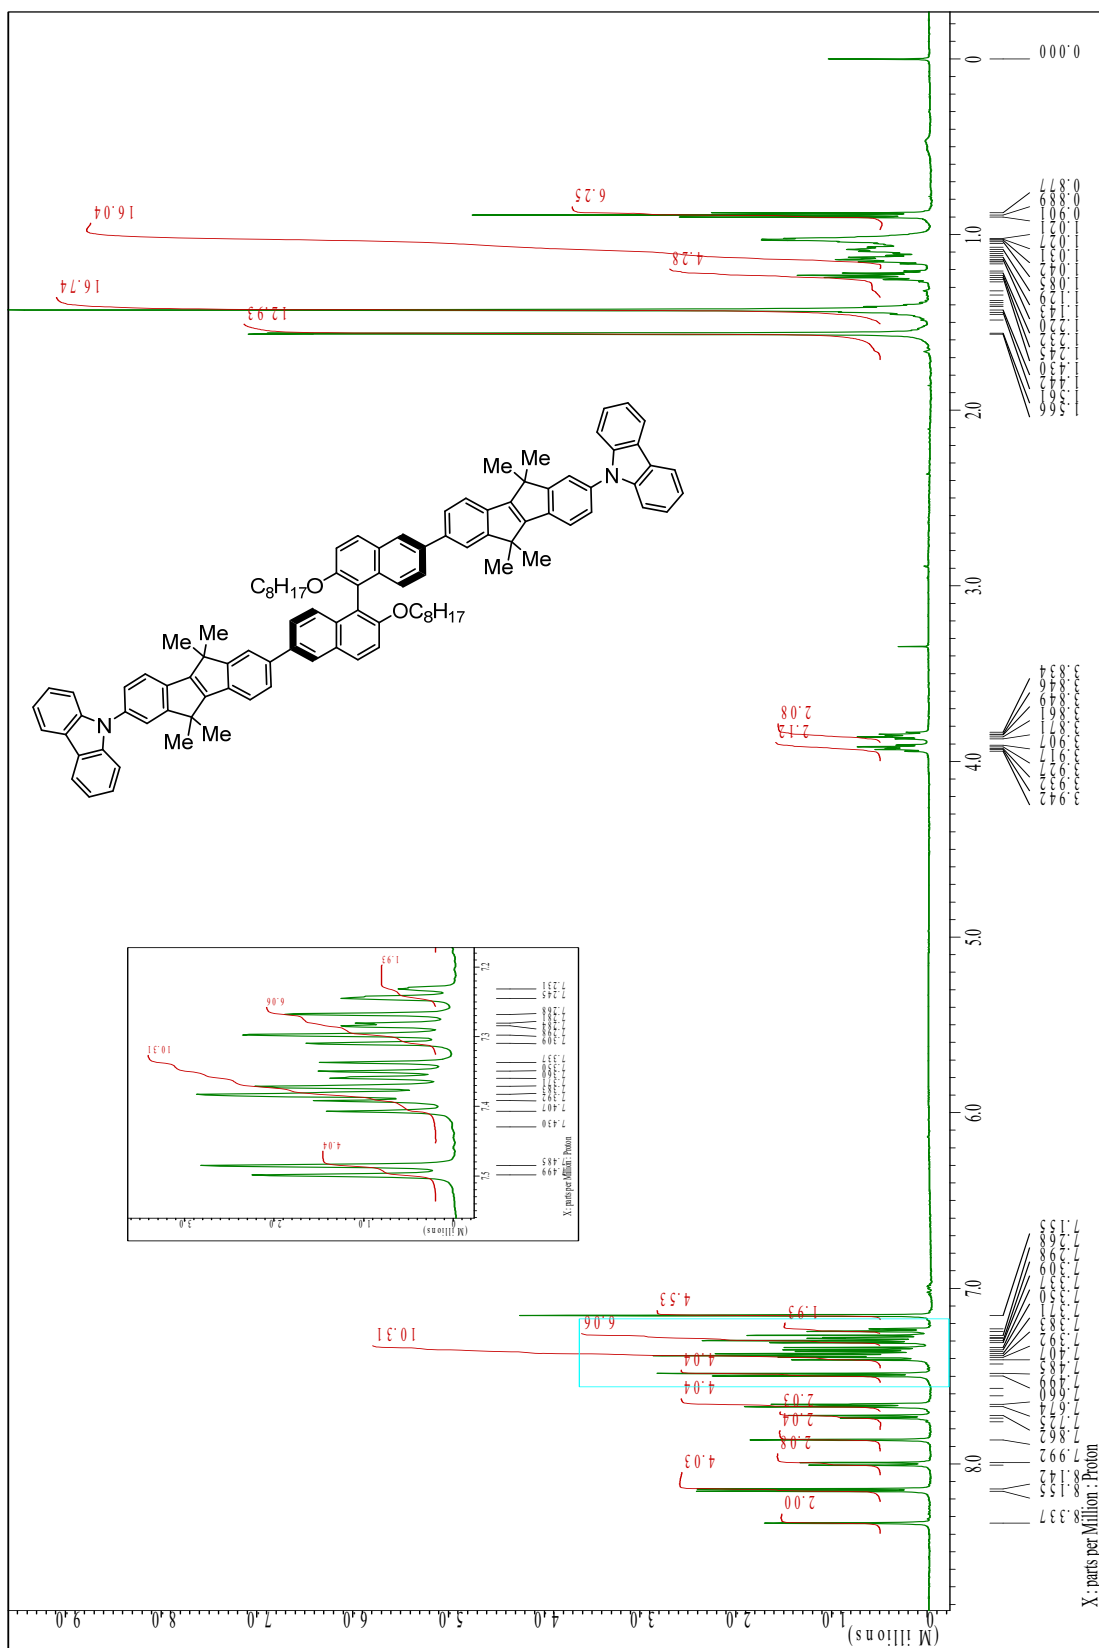

Figure S9.  $^1\text{H}$  NMR of  $(S)$ -6,6'-(CzCOPV1) $_2$ -binaph

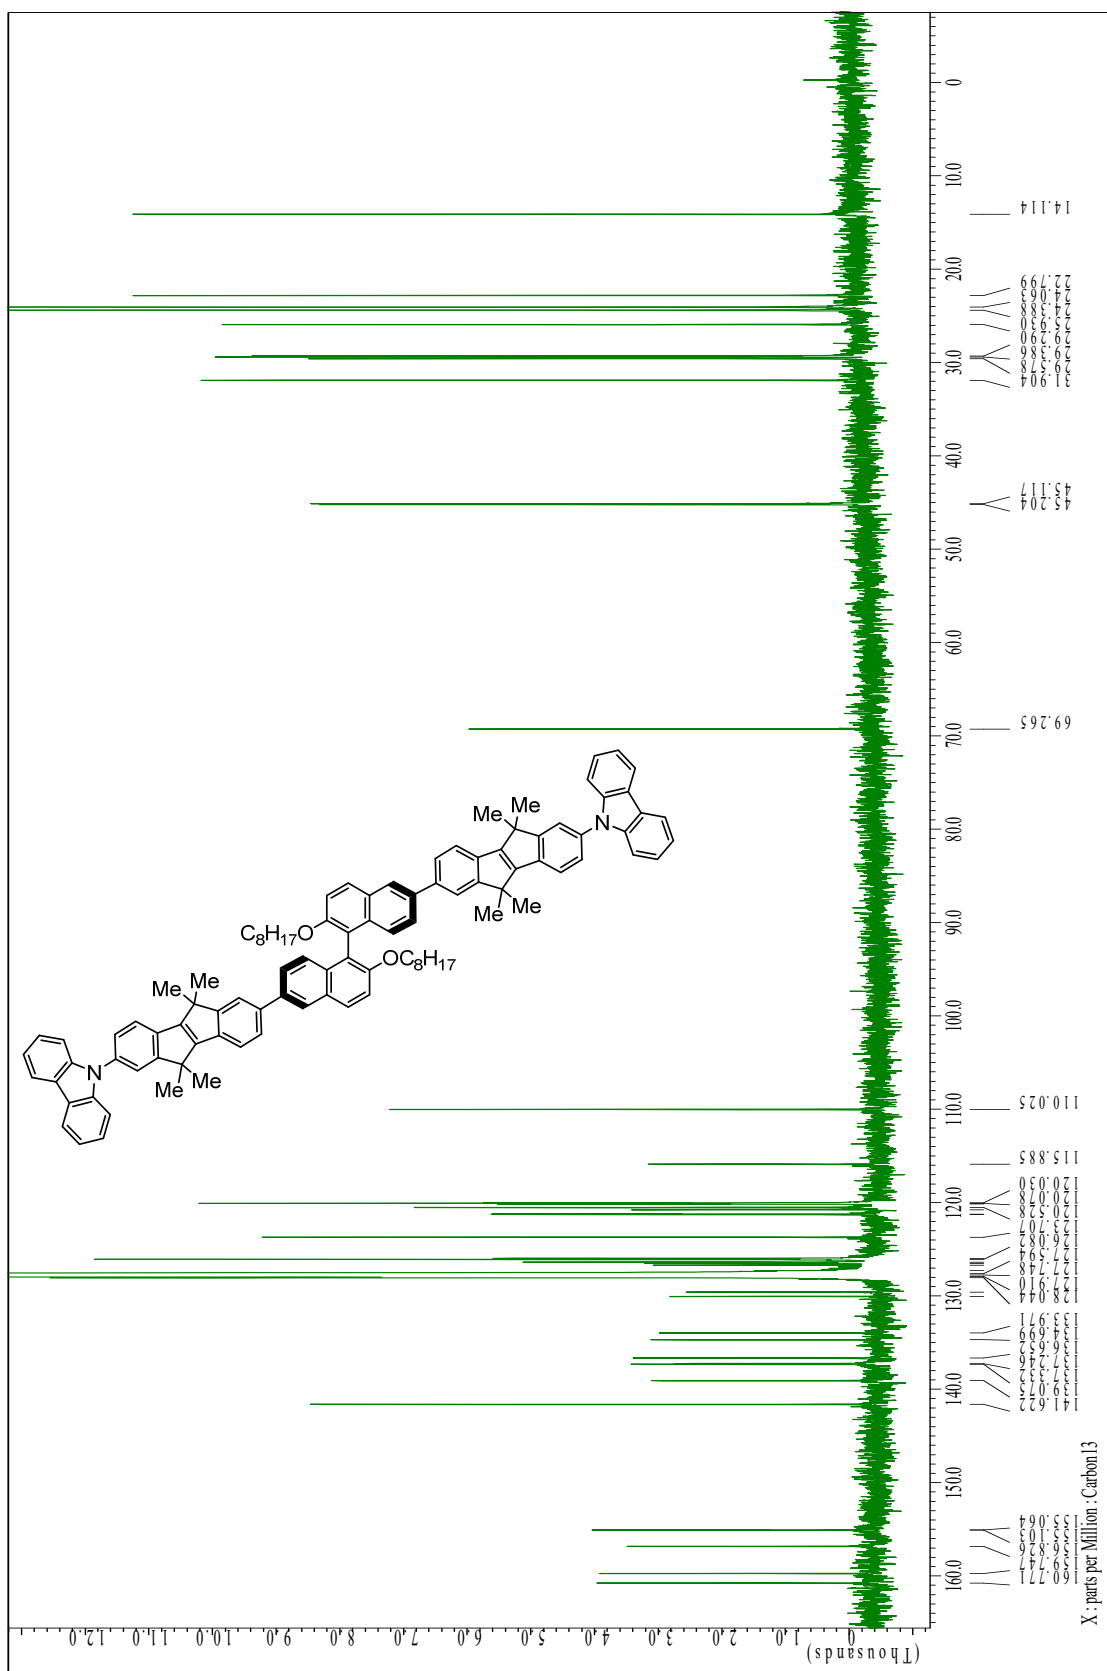

Figure S10. <sup>13</sup>C NMR of *(S)*-6,6'-(CzCOPV1)<sub>2</sub>-binaph

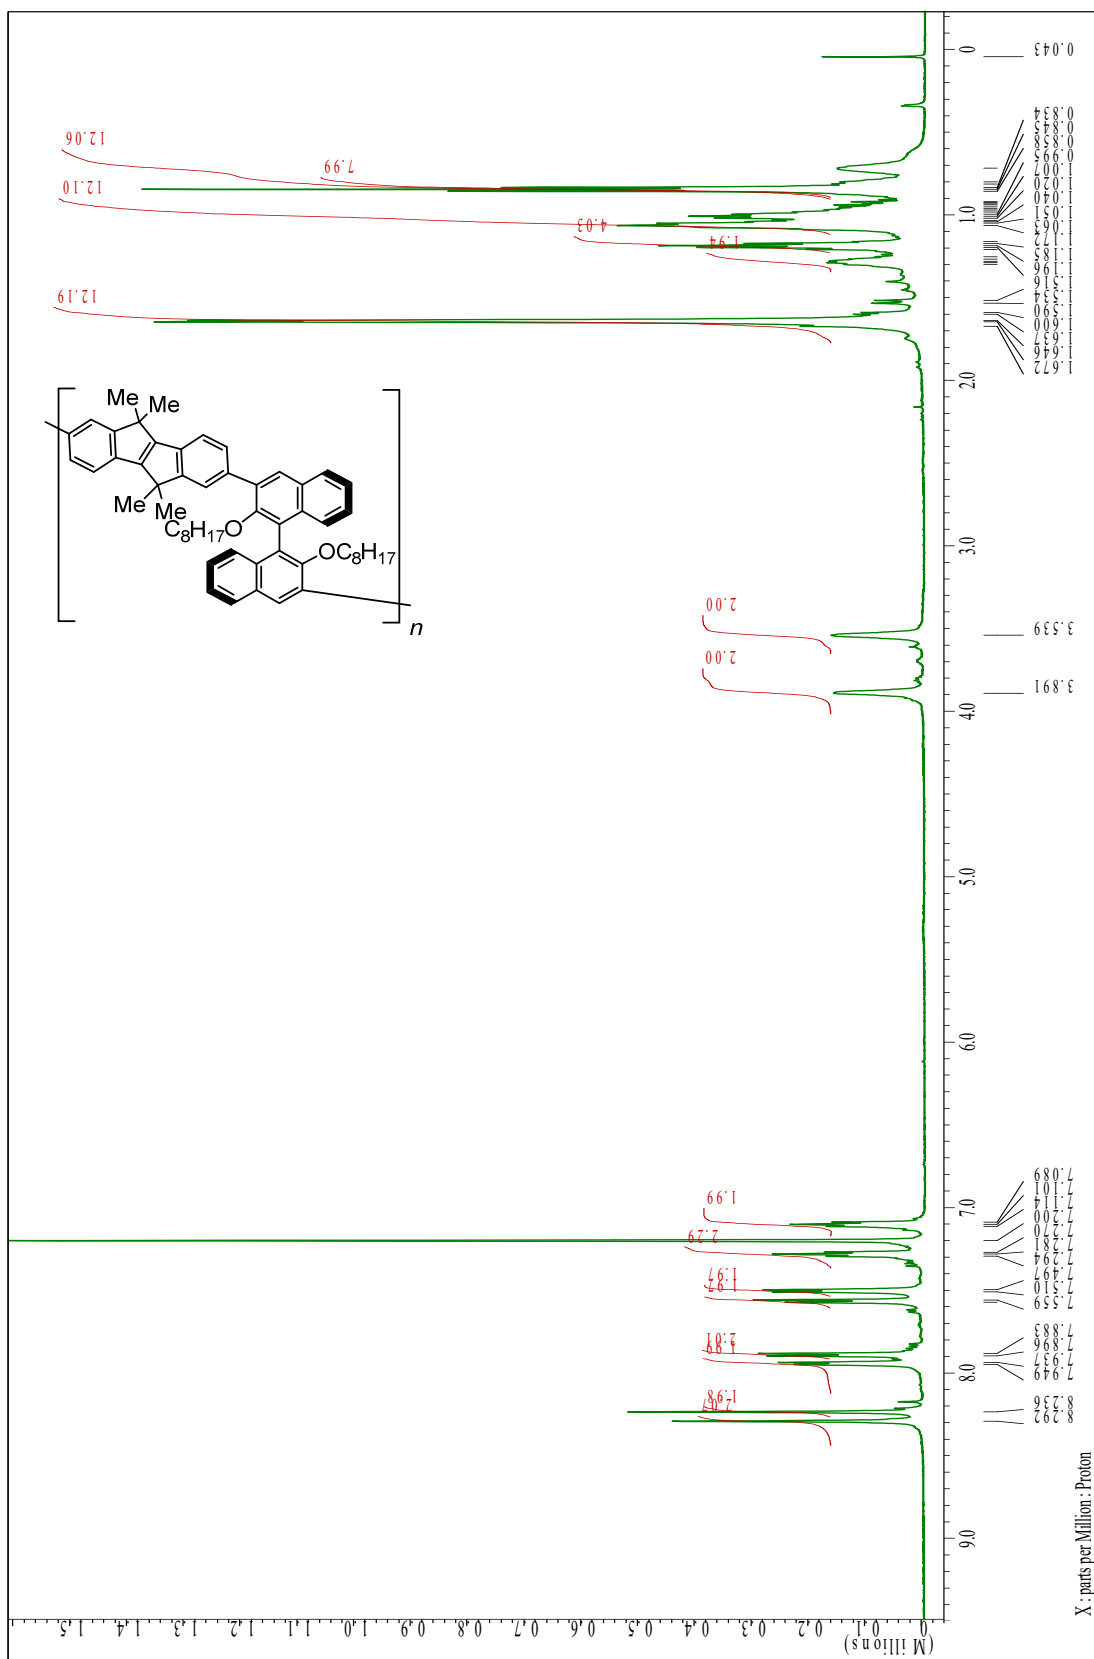

Figure S11. <sup>1</sup>H NMR of poly-[(S)-3,3'-COPV1-binaph]



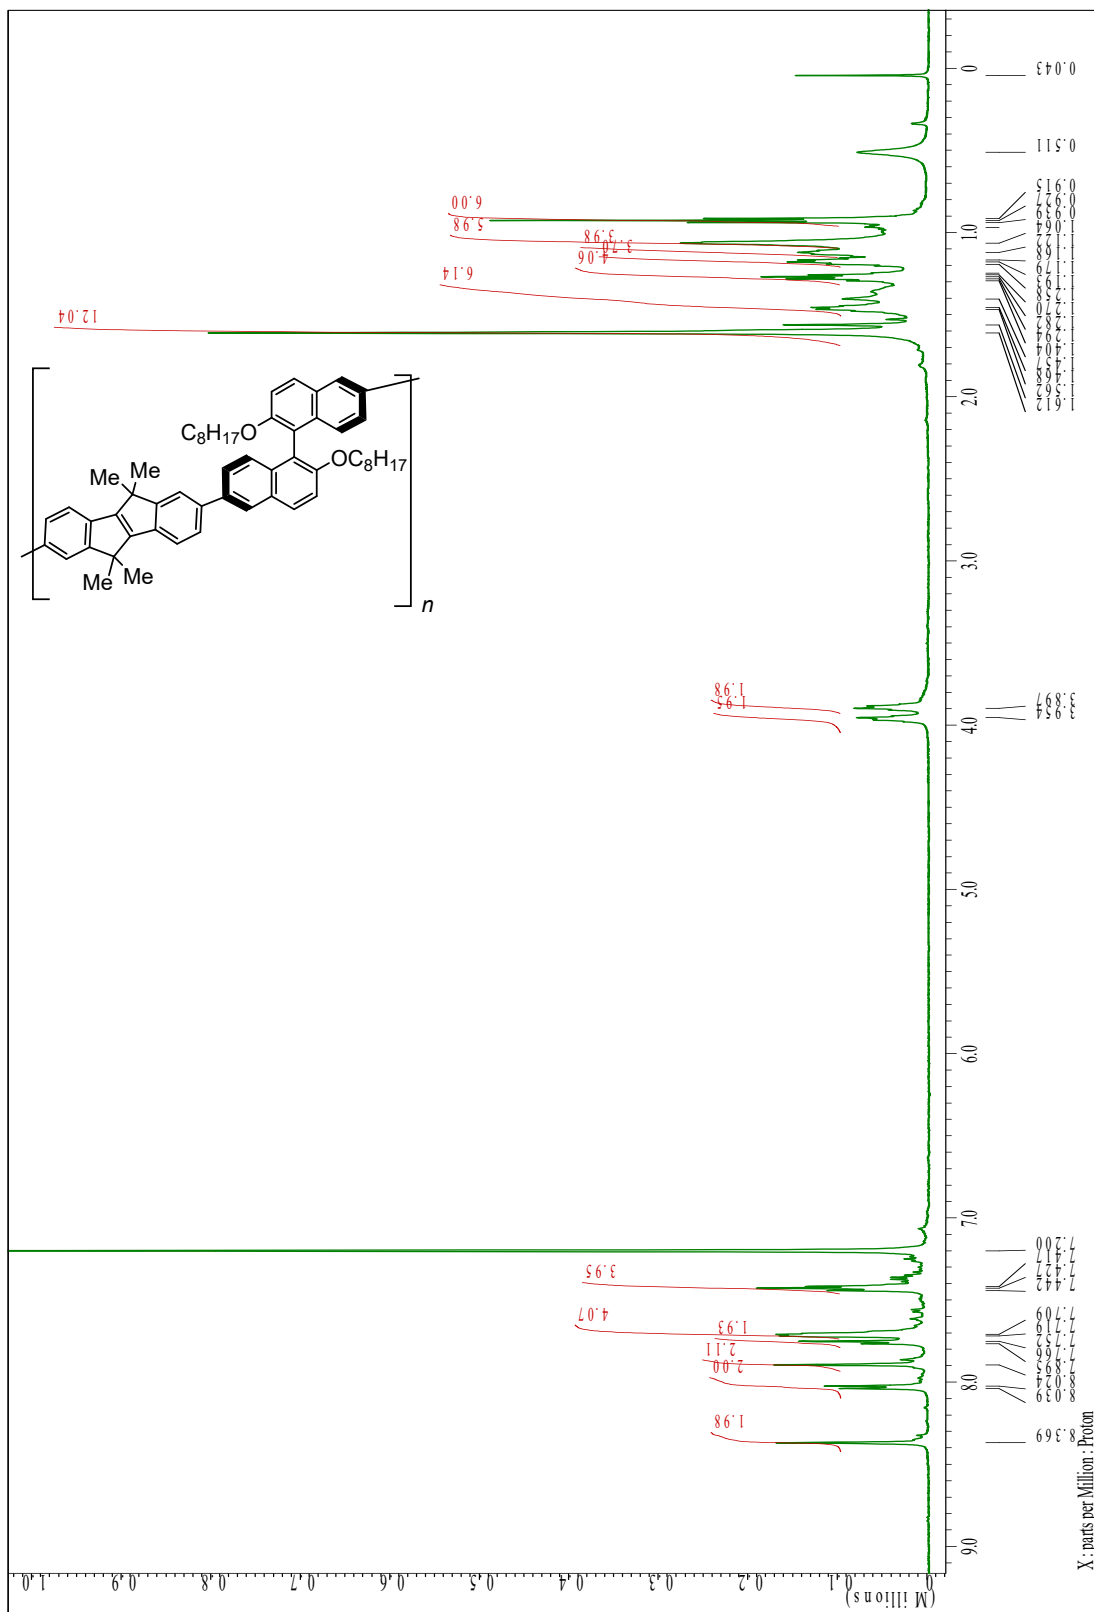

Figure S13.  $^1\text{H}$  NMR of poly-[(S)-6,6'-COPV1-binaph]



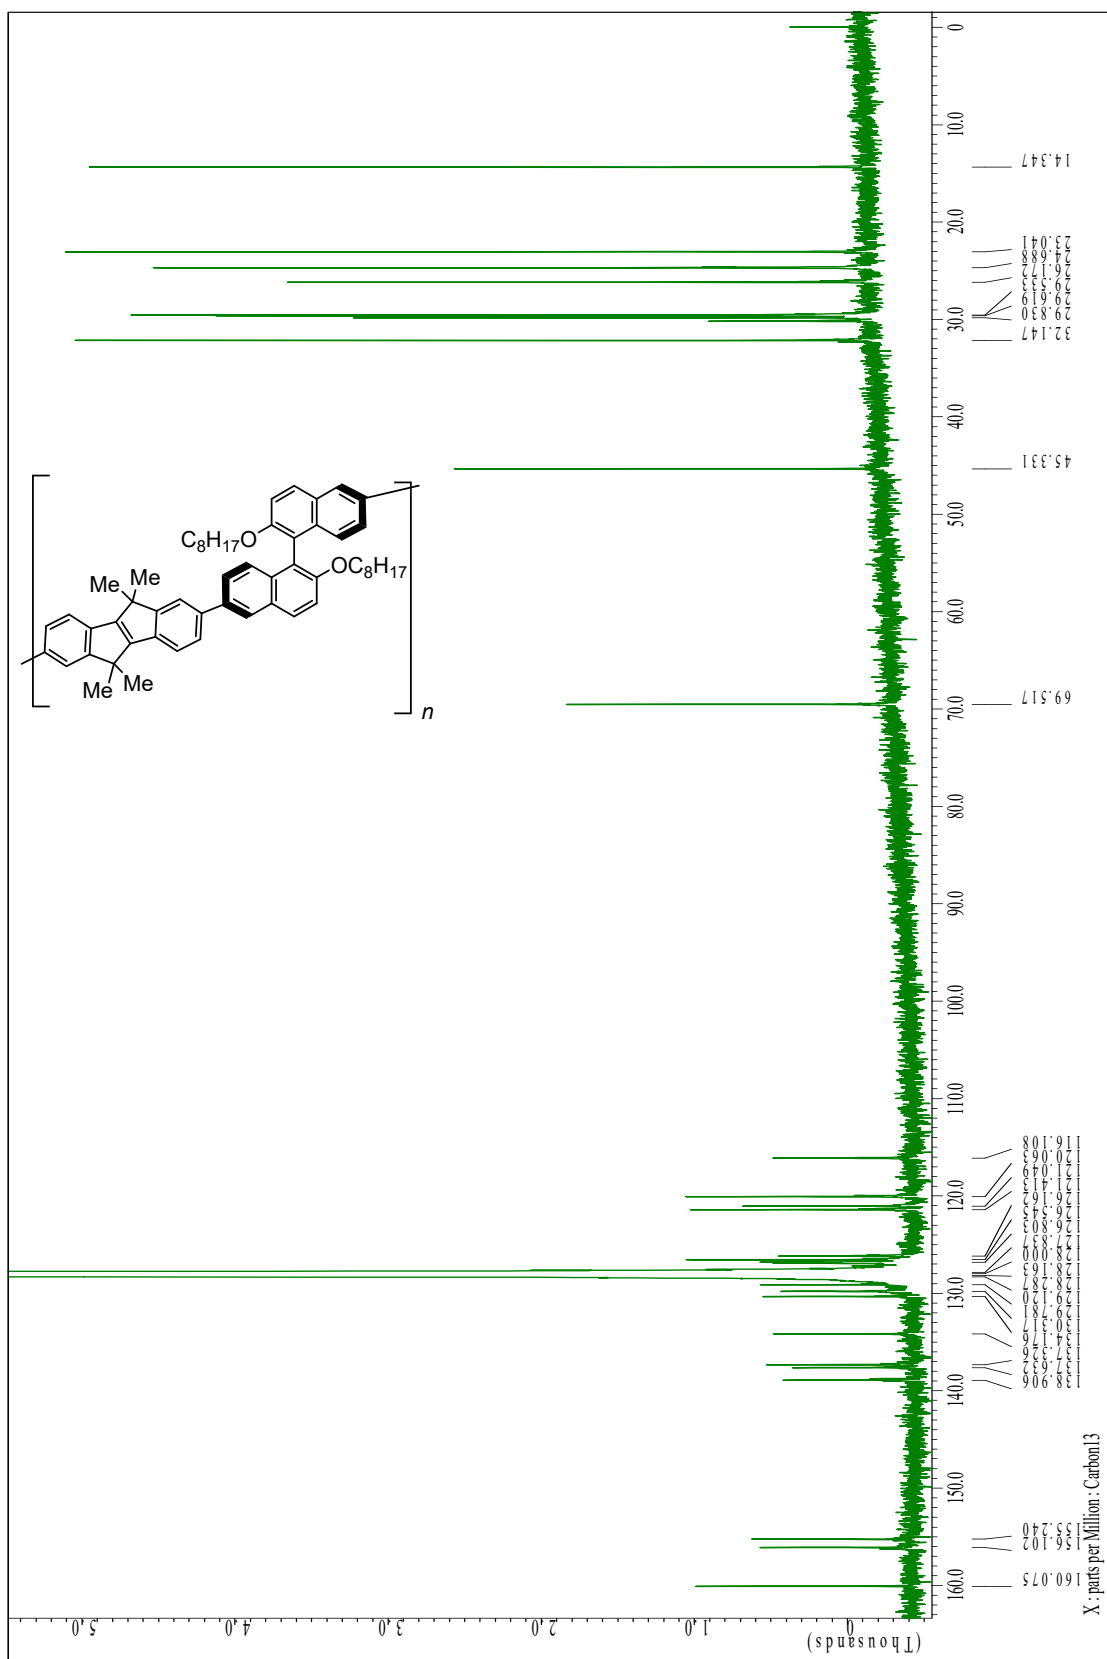

### 3. Calculations

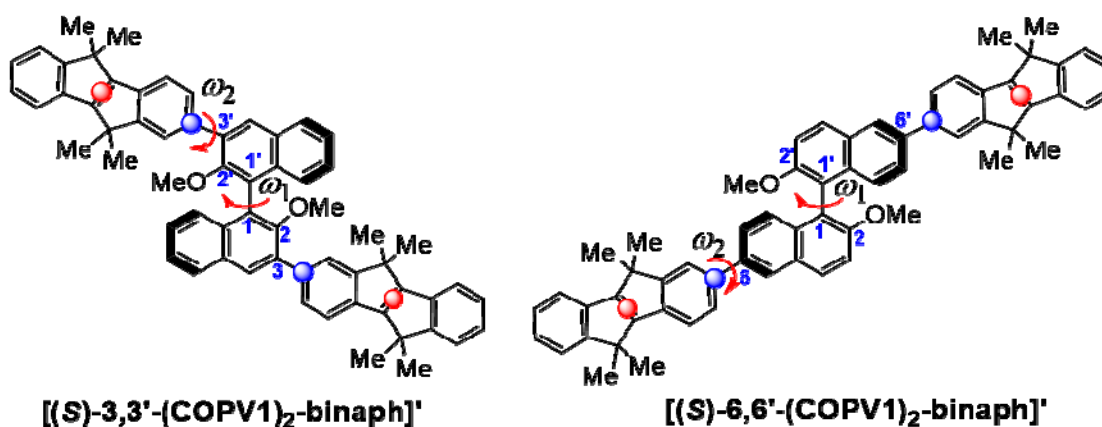

Figure S15. Structures of model compounds for calculations.

Table S1. Optimized coordinates of a model compound [(S)-3,3'-(COPV1)<sub>2</sub>-binaph]' and in the S<sub>0</sub> state.

Total energy = -2545.6089624 a.u.

| Center Number | Atomic Number | Atomic Type | Coordinates (Angstroms) |           |          |
|---------------|---------------|-------------|-------------------------|-----------|----------|
|               |               |             | X                       | Y         | Z        |
| 1             | 6             | 0           | 0.050028                | 3.053370  | 1.556208 |
| 2             | 1             | 0           | 1.602813                | 4.369451  | 2.199279 |
| 3             | 6             | 0           | 1.236713                | 3.345760  | 2.201919 |
| 4             | 6             | 0           | 0.266790                | 0.700255  | 2.281111 |
| 5             | 6             | 0           | 1.967253                | 2.371341  | 2.924384 |
| 6             | 6             | 0           | -0.419542               | 1.699043  | 1.603964 |
| 7             | 6             | 0           | 1.473671                | 1.029175  | 2.984939 |
| 8             | 6             | 0           | 3.163591                | 2.707060  | 3.614717 |
| 9             | 1             | 0           | 1.829139                | -0.935380 | 3.822463 |
| 10            | 6             | 0           | 3.846337                | 1.762630  | 4.345417 |
| 11            | 1             | 0           | 3.525859                | 3.731068  | 3.558062 |
| 12            | 1             | 0           | 4.758883                | 2.030623  | 4.871111 |
| 13            | 6             | 0           | 3.352953                | 0.438307  | 4.418577 |
| 14            | 1             | 0           | 3.889159                | -0.303462 | 5.004560 |
| 15            | 6             | 0           | 2.199196                | 0.081622  | 3.756176 |
| 16            | 6             | 0           | 0.419542                | -1.699043 | 1.603964 |
| 17            | 6             | 0           | -0.266790               | -0.700255 | 2.281111 |
| 18            | 6             | 0           | -1.236713               | -3.345760 | 2.201919 |
| 19            | 6             | 0           | -1.473671               | -1.029175 | 2.984939 |
| 20            | 6             | 0           | -0.050028               | -3.053370 | 1.556208 |
| 21            | 6             | 0           | -1.967253               | -2.371341 | 2.924384 |
| 22            | 6             | 0           | -2.199196               | -0.081622 | 3.756176 |
| 23            | 1             | 0           | -3.525859               | -3.731068 | 3.558062 |
| 24            | 1             | 0           | -1.602813               | -4.369451 | 2.199279 |
| 25            | 6             | 0           | -3.352953               | -0.438307 | 4.418577 |
| 26            | 1             | 0           | -1.829139               | 0.935380  | 3.822463 |

|    |   |   |           |            |           |
|----|---|---|-----------|------------|-----------|
| 27 | 1 | 0 | -3.889159 | 0.303462   | 5.004560  |
| 28 | 6 | 0 | -3.846337 | -1.762630  | 4.345417  |
| 29 | 1 | 0 | -4.758883 | -2.030623  | 4.871111  |
| 30 | 6 | 0 | -3.163591 | -2.707060  | 3.614717  |
| 31 | 8 | 0 | -1.628470 | 1.386395   | 1.012991  |
| 32 | 8 | 0 | 1.628470  | -1.386395  | 1.012991  |
| 33 | 6 | 0 | -1.617258 | 1.229997   | -0.405053 |
| 34 | 1 | 0 | -1.075945 | 0.319982   | -0.691646 |
| 35 | 1 | 0 | -1.170513 | 2.097320   | -0.904556 |
| 36 | 1 | 0 | -2.661897 | 1.137367   | -0.710976 |
| 37 | 6 | 0 | 1.617258  | -1.229997  | -0.405053 |
| 38 | 1 | 0 | 2.661897  | -1.137367  | -0.710976 |
| 39 | 1 | 0 | 1.075945  | -0.319982  | -0.691646 |
| 40 | 1 | 0 | 1.170513  | -2.097320  | -0.904556 |
| 41 | 1 | 0 | -3.844605 | 5.460444   | 0.596192  |
| 42 | 6 | 0 | -2.775000 | 5.355403   | 0.435264  |
| 43 | 6 | 0 | -0.002868 | 5.061243   | 0.053293  |
| 44 | 6 | 0 | -2.075294 | 6.266593   | -0.360563 |
| 45 | 6 | 0 | -2.086039 | 4.300732   | 1.036203  |
| 46 | 6 | 0 | -0.699505 | 4.135670   | 0.862798  |
| 47 | 6 | 0 | -0.678083 | 6.109133   | -0.548314 |
| 48 | 1 | 0 | -2.626843 | 3.593013   | 1.654066  |
| 49 | 1 | 0 | 1.065552  | 4.928702   | -0.101160 |
| 50 | 6 | 0 | -2.479712 | 7.443569   | -1.114842 |
| 51 | 6 | 0 | -1.402579 | 7.988215   | -1.737991 |
| 52 | 6 | 0 | -1.806007 | 9.167733   | -2.491522 |
| 53 | 6 | 0 | -3.163591 | 11.281345  | -3.702806 |
| 54 | 6 | 0 | -3.203992 | 9.325858   | -2.299832 |
| 55 | 6 | 0 | -1.097589 | 10.070242  | -3.289397 |
| 56 | 6 | 0 | -1.788332 | 11.126663  | -3.892124 |
| 57 | 6 | 0 | -3.878373 | 10.376941  | -2.902370 |
| 58 | 1 | 0 | -0.027589 | 9.959179   | -3.443138 |
| 59 | 1 | 0 | -1.247800 | 11.834930  | -4.514720 |
| 60 | 1 | 0 | -4.949252 | 10.506903  | -2.761586 |
| 61 | 1 | 0 | -3.684729 | 12.107863  | -4.178417 |
| 62 | 6 | 0 | -3.754260 | 8.218054   | -1.390077 |
| 63 | 6 | 0 | -0.127557 | 7.214043   | -1.462285 |
| 64 | 1 | 0 | 3.844605  | -5.460444  | 0.596192  |
| 65 | 6 | 0 | 2.775000  | -5.355403  | 0.435264  |
| 66 | 6 | 0 | 0.002868  | -5.061243  | 0.053293  |
| 67 | 6 | 0 | 2.075294  | -6.266593  | -0.360563 |
| 68 | 6 | 0 | 2.086039  | -4.300732  | 1.036203  |
| 69 | 6 | 0 | 0.699505  | -4.135670  | 0.862798  |
| 70 | 6 | 0 | 0.678083  | -6.109133  | -0.548314 |
| 71 | 1 | 0 | 2.626843  | -3.593013  | 1.654066  |
| 72 | 1 | 0 | -1.065552 | -4.928702  | -0.101160 |
| 73 | 6 | 0 | 2.479712  | -7.443569  | -1.114842 |
| 74 | 6 | 0 | 1.402579  | -7.988215  | -1.737991 |
| 75 | 6 | 0 | 1.806007  | -9.167733  | -2.491522 |
| 76 | 6 | 0 | 3.163591  | -11.281345 | -3.702806 |
| 77 | 6 | 0 | 3.203992  | -9.325858  | -2.299832 |
| 78 | 6 | 0 | 1.097589  | -10.070242 | -3.289397 |
| 79 | 6 | 0 | 1.788332  | -11.126663 | -3.892124 |
| 80 | 6 | 0 | 3.878373  | -10.376941 | -2.902370 |

|     |   |   |           |            |           |
|-----|---|---|-----------|------------|-----------|
| 81  | 1 | 0 | 0.027589  | -9.959179  | -3.443138 |
| 82  | 1 | 0 | 1.247800  | -11.834930 | -4.514720 |
| 83  | 1 | 0 | 4.949252  | -10.506903 | -2.761586 |
| 84  | 1 | 0 | 3.684729  | -12.107863 | -4.178417 |
| 85  | 6 | 0 | 3.754260  | -8.218054  | -1.390077 |
| 86  | 6 | 0 | 0.127557  | -7.214043  | -1.462285 |
| 87  | 6 | 0 | -0.477005 | -6.624606  | -2.756896 |
| 88  | 1 | 0 | -1.352644 | -6.006217  | -2.528231 |
| 89  | 1 | 0 | -0.796292 | -7.424203  | -3.435188 |
| 90  | 1 | 0 | 0.253578  | -6.002308  | -3.283473 |
| 91  | 6 | 0 | -0.922662 | -8.079176  | -0.729152 |
| 92  | 1 | 0 | -1.805545 | -7.481752  | -0.474009 |
| 93  | 1 | 0 | -0.511793 | -8.495154  | 0.196218  |
| 94  | 1 | 0 | -1.250239 | -8.911800  | -1.362223 |
| 95  | 6 | 0 | 4.803155  | -7.354383  | -2.126989 |
| 96  | 1 | 0 | 5.131456  | -6.520324  | -1.496116 |
| 97  | 1 | 0 | 4.390922  | -6.940950  | -3.052932 |
| 98  | 1 | 0 | 5.685704  | -7.952136  | -2.382242 |
| 99  | 6 | 0 | 4.360899  | -8.803359  | -0.094463 |
| 100 | 1 | 0 | 4.679612  | -8.001507  | 0.581443  |
| 101 | 1 | 0 | 5.237283  | -9.420864  | -0.322516 |
| 102 | 1 | 0 | 3.632101  | -9.425978  | 0.434044  |
| 103 | 6 | 0 | 0.477005  | 6.624606   | -2.756896 |
| 104 | 1 | 0 | 0.796292  | 7.424203   | -3.435188 |
| 105 | 1 | 0 | -0.253578 | 6.002308   | -3.283473 |
| 106 | 1 | 0 | 1.352644  | 6.006217   | -2.528231 |
| 107 | 6 | 0 | 0.922662  | 8.079176   | -0.729152 |
| 108 | 1 | 0 | 0.511793  | 8.495154   | 0.196218  |
| 109 | 1 | 0 | 1.250239  | 8.911800   | -1.362223 |
| 110 | 1 | 0 | 1.805545  | 7.481752   | -0.474009 |
| 111 | 6 | 0 | -4.803155 | 7.354383   | -2.126989 |
| 112 | 1 | 0 | -5.685704 | 7.952136   | -2.382242 |
| 113 | 1 | 0 | -5.131456 | 6.520324   | -1.496116 |
| 114 | 1 | 0 | -4.390922 | 6.940950   | -3.052932 |
| 115 | 6 | 0 | -4.360899 | 8.803359   | -0.094463 |
| 116 | 1 | 0 | -5.237283 | 9.420864   | -0.322516 |
| 117 | 1 | 0 | -3.632101 | 9.425978   | 0.434044  |
| 118 | 1 | 0 | -4.679612 | 8.001507   | 0.581443  |

**Table S2.** Optimized coordinates of a model compound **[(S)-3,3'-(COPV1)<sub>2</sub>-binaph]'** and in the S<sub>1</sub> state.

Total energy = -2545.6031367 a.u.

| Center Number | Atomic Number | Atomic Type | Coordinates (Angstroms) |          |          |
|---------------|---------------|-------------|-------------------------|----------|----------|
|               |               |             | X                       | Y        | Z        |
| 1             | 6             | 0           | -0.606334               | 2.991973 | 1.471899 |
| 2             | 1             | 0           | 0.702022                | 4.599431 | 2.049651 |
| 3             | 6             | 0           | 0.543957                | 3.524823 | 2.069255 |
| 4             | 6             | 0           | 0.110383                | 0.738728 | 2.211731 |
| 5             | 6             | 0           | 1.465552                | 2.732625 | 2.779755 |

|    |   |   |           |           |           |
|----|---|---|-----------|-----------|-----------|
| 6  | 6 | 0 | -0.790449 | 1.573187  | 1.561060  |
| 7  | 6 | 0 | 1.249033  | 1.316778  | 2.883439  |
| 8  | 6 | 0 | 2.596572  | 3.309039  | 3.429025  |
| 9  | 1 | 0 | 1.983441  | -0.511813 | 3.764464  |
| 10 | 6 | 0 | 3.464618  | 2.532365  | 4.163566  |
| 11 | 1 | 0 | 2.755260  | 4.381341  | 3.338246  |
| 12 | 1 | 0 | 4.320256  | 2.986875  | 4.656563  |
| 13 | 6 | 0 | 3.235884  | 1.144200  | 4.287311  |
| 14 | 1 | 0 | 3.911589  | 0.535629  | 4.882238  |
| 15 | 6 | 0 | 2.152516  | 0.554191  | 3.659374  |
| 16 | 6 | 0 | 0.790449  | -1.573187 | 1.561060  |
| 17 | 6 | 0 | -0.110383 | -0.738728 | 2.211731  |
| 18 | 6 | 0 | -0.543957 | -3.524823 | 2.069255  |
| 19 | 6 | 0 | -1.249033 | -1.316778 | 2.883439  |
| 20 | 6 | 0 | 0.606334  | -2.991973 | 1.471899  |
| 21 | 6 | 0 | -1.465552 | -2.732625 | 2.779755  |
| 22 | 6 | 0 | -2.152516 | -0.554191 | 3.659374  |
| 23 | 1 | 0 | -2.755260 | -4.381341 | 3.338246  |
| 24 | 1 | 0 | -0.702022 | -4.599431 | 2.049651  |
| 25 | 6 | 0 | -3.235884 | -1.144200 | 4.287311  |
| 26 | 1 | 0 | -1.983441 | 0.511813  | 3.764464  |
| 27 | 1 | 0 | -3.911589 | -0.535629 | 4.882238  |
| 28 | 6 | 0 | -3.464618 | -2.532365 | 4.163566  |
| 29 | 1 | 0 | -4.320256 | -2.986875 | 4.656563  |
| 30 | 6 | 0 | -2.596572 | -3.309039 | 3.429025  |
| 31 | 8 | 0 | -1.919376 | 1.010099  | 0.990455  |
| 32 | 8 | 0 | 1.919376  | -1.010099 | 0.990455  |
| 33 | 6 | 0 | -1.845752 | 0.731705  | -0.405605 |
| 34 | 1 | 0 | -1.148565 | -0.090992 | -0.603735 |
| 35 | 1 | 0 | -1.543078 | 1.617350  | -0.977861 |
| 36 | 1 | 0 | -2.850442 | 0.430863  | -0.712579 |
| 37 | 6 | 0 | 1.845752  | -0.731705 | -0.405605 |
| 38 | 1 | 0 | 2.850442  | -0.430863 | -0.712579 |
| 39 | 1 | 0 | 1.148565  | 0.090992  | -0.603735 |
| 40 | 1 | 0 | 1.543078  | -1.617350 | -0.977861 |
| 41 | 1 | 0 | -4.921928 | 4.372821  | 0.310635  |
| 42 | 6 | 0 | -3.853543 | 4.560083  | 0.244494  |
| 43 | 6 | 0 | -1.076508 | 5.044919  | 0.119710  |
| 44 | 6 | 0 | -3.363731 | 5.701240  | -0.422315 |
| 45 | 6 | 0 | -2.963881 | 3.676235  | 0.833580  |
| 46 | 6 | 0 | -1.556758 | 3.885821  | 0.793884  |
| 47 | 6 | 0 | -1.950838 | 5.926198  | -0.474831 |
| 48 | 1 | 0 | -3.343134 | 2.805687  | 1.352991  |
| 49 | 1 | 0 | -0.004191 | 5.207389  | 0.052529  |
| 50 | 6 | 0 | -3.994798 | 6.776662  | -1.122648 |
| 51 | 6 | 0 | -3.042606 | 7.652650  | -1.610932 |
| 52 | 6 | 0 | -3.680440 | 8.728924  | -2.317574 |
| 53 | 6 | 0 | -5.455505 | 10.513323 | -3.530270 |
| 54 | 6 | 0 | -5.090267 | 8.502449  | -2.258632 |
| 55 | 6 | 0 | -3.177393 | 9.857201  | -2.989844 |
| 56 | 6 | 0 | -4.073691 | 10.739263 | -3.590388 |
| 57 | 6 | 0 | -5.966581 | 9.388776  | -2.860863 |
| 58 | 1 | 0 | -2.108075 | 10.041619 | -3.042038 |
| 59 | 1 | 0 | -3.696554 | 11.614703 | -4.112567 |

|     |   |   |           |            |           |
|-----|---|---|-----------|------------|-----------|
| 60  | 1 | 0 | -7.041139 | 9.224647   | -2.821218 |
| 61  | 1 | 0 | -6.137303 | 11.213538  | -4.004918 |
| 62  | 6 | 0 | -5.401624 | 7.217373   | -1.477752 |
| 63  | 6 | 0 | -1.635992 | 7.212272   | -1.257005 |
| 64  | 1 | 0 | 4.921928  | -4.372821  | 0.310635  |
| 65  | 6 | 0 | 3.853543  | -4.560083  | 0.244494  |
| 66  | 6 | 0 | 1.076508  | -5.044919  | 0.119710  |
| 67  | 6 | 0 | 3.363731  | -5.701240  | -0.422315 |
| 68  | 6 | 0 | 2.963881  | -3.676235  | 0.833580  |
| 69  | 6 | 0 | 1.556758  | -3.885821  | 0.793884  |
| 70  | 6 | 0 | 1.950838  | -5.926198  | -0.474831 |
| 71  | 1 | 0 | 3.343134  | -2.805687  | 1.352991  |
| 72  | 1 | 0 | 0.004191  | -5.207389  | 0.052529  |
| 73  | 6 | 0 | 3.994798  | -6.776662  | -1.122648 |
| 74  | 6 | 0 | 3.042606  | -7.652650  | -1.610932 |
| 75  | 6 | 0 | 3.680440  | -8.728924  | -2.317574 |
| 76  | 6 | 0 | 5.455505  | -10.513323 | -3.530270 |
| 77  | 6 | 0 | 5.090267  | -8.502449  | -2.258632 |
| 78  | 6 | 0 | 3.177393  | -9.857201  | -2.989844 |
| 79  | 6 | 0 | 4.073691  | -10.739263 | -3.590388 |
| 80  | 6 | 0 | 5.966581  | -9.388776  | -2.860863 |
| 81  | 1 | 0 | 2.108075  | -10.041619 | -3.042038 |
| 82  | 1 | 0 | 3.696554  | -11.614703 | -4.112567 |
| 83  | 1 | 0 | 7.041139  | -9.224647  | -2.821218 |
| 84  | 1 | 0 | 6.137303  | -11.213538 | -4.004918 |
| 85  | 6 | 0 | 5.401624  | -7.217373  | -1.477752 |
| 86  | 6 | 0 | 1.635992  | -7.212272  | -1.257005 |
| 87  | 6 | 0 | 0.790449  | -6.915282  | -2.517269 |
| 88  | 1 | 0 | -0.192366 | -6.519532  | -2.236286 |
| 89  | 1 | 0 | 0.632501  | -7.827557  | -3.103967 |
| 90  | 1 | 0 | 1.284900  | -6.178120  | -3.157704 |
| 91  | 6 | 0 | 0.914009  | -8.249316  | -0.365572 |
| 92  | 1 | 0 | -0.066358 | -7.870956  | -0.053589 |
| 93  | 1 | 0 | 1.497310  | -8.468042  | 0.534317  |
| 94  | 1 | 0 | 0.757046  | -9.188111  | -0.909126 |
| 95  | 6 | 0 | 6.122212  | -6.177866  | -2.367168 |
| 96  | 1 | 0 | 6.272750  | -5.239232  | -1.821942 |
| 97  | 1 | 0 | 5.540475  | -5.960415  | -3.268465 |
| 98  | 1 | 0 | 7.105375  | -6.551109  | -2.676160 |
| 99  | 6 | 0 | 6.245292  | -7.514269  | -0.216321 |
| 100 | 1 | 0 | 6.397162  | -6.602194  | 0.371878  |
| 101 | 1 | 0 | 7.230604  | -7.905063  | -0.495310 |
| 102 | 1 | 0 | 5.752098  | -8.254214  | 0.421760  |
| 103 | 6 | 0 | -0.790449 | 6.915282   | -2.517269 |
| 104 | 1 | 0 | -0.632501 | 7.827557   | -3.103967 |
| 105 | 1 | 0 | -1.284900 | 6.178120   | -3.157704 |
| 106 | 1 | 0 | 0.192366  | 6.519532   | -2.236286 |
| 107 | 6 | 0 | -0.914009 | 8.249316   | -0.365572 |
| 108 | 1 | 0 | -1.497310 | 8.468042   | 0.534317  |
| 109 | 1 | 0 | -0.757046 | 9.188111   | -0.909126 |
| 110 | 1 | 0 | 0.066358  | 7.870956   | -0.053589 |
| 111 | 6 | 0 | -6.122212 | 6.177866   | -2.367168 |
| 112 | 1 | 0 | -7.105375 | 6.551109   | -2.676160 |
| 113 | 1 | 0 | -6.272750 | 5.239232   | -1.821942 |

|     |   |   |           |          |           |
|-----|---|---|-----------|----------|-----------|
| 114 | 1 | 0 | -5.540475 | 5.960415 | -3.268465 |
| 115 | 6 | 0 | -6.245292 | 7.514269 | -0.216321 |
| 116 | 1 | 0 | -7.230604 | 7.905063 | -0.495310 |
| 117 | 1 | 0 | -5.752098 | 8.254214 | 0.421760  |
| 118 | 1 | 0 | -6.397162 | 6.602194 | 0.371878  |

**Table S3.** Optimized coordinates of a model compound **[(S)-6,6'-(COPV1)<sub>2</sub>-binaph]'** and in the S<sub>0</sub> state.

Total energy = -2545.6219593 a.u.

| Center Number | Atomic Number | Atomic Type | Coordinates (Angstroms) |          |           |
|---------------|---------------|-------------|-------------------------|----------|-----------|
|               |               |             | X                       | Y        | Z         |
| 1             | 1             | 0           | -1.481532               | 5.044264 | -3.406458 |
| 2             | 6             | 0           | -1.537583               | 4.371999 | -2.558147 |
| 3             | 1             | 0           | -3.419827               | 3.564321 | -3.163867 |
| 4             | 6             | 0           | -2.626018               | 3.541551 | -2.420897 |
| 5             | 6             | 0           | -0.555767               | 3.487855 | -0.500418 |
| 6             | 6             | 0           | -2.736671               | 2.651622 | -1.324786 |
| 7             | 6             | 0           | -0.498046               | 4.349026 | -1.593589 |
| 8             | 6             | 0           | -1.681605               | 2.625579 | -0.353872 |
| 9             | 6             | 0           | -3.852670               | 1.789175 | -1.173644 |
| 10            | 1             | 0           | -1.034336               | 1.687126 | 1.489037  |
| 11            | 6             | 0           | -3.965348               | 0.912004 | -0.108646 |
| 12            | 1             | 0           | -4.622044               | 1.809591 | -1.941905 |
| 13            | 6             | 0           | -2.908931               | 0.896283 | 0.850935  |
| 14            | 1             | 0           | -2.989564               | 0.235997 | 1.709840  |
| 15            | 6             | 0           | -1.814372               | 1.717384 | 0.735316  |
| 16            | 6             | 0           | 0.498035                | 4.349009 | 1.593591  |
| 17            | 6             | 0           | 0.555763                | 3.487853 | 0.500411  |
| 18            | 6             | 0           | 2.626009                | 3.541534 | 2.420899  |
| 19            | 6             | 0           | 1.681607                | 2.625583 | 0.353857  |
| 20            | 6             | 0           | 1.537570                | 4.371974 | 2.558155  |
| 21            | 6             | 0           | 2.736669                | 2.651618 | 1.324776  |
| 22            | 6             | 0           | 1.814381                | 1.717404 | -0.735341 |
| 23            | 1             | 0           | 1.481510                | 5.044230 | 3.406473  |
| 24            | 1             | 0           | 4.622039                | 1.809581 | 1.941894  |
| 25            | 1             | 0           | 3.419816                | 3.564295 | 3.163870  |
| 26            | 6             | 0           | 2.908943                | 0.896306 | -0.850966 |
| 27            | 1             | 0           | 1.034350                | 1.687154 | -1.489066 |
| 28            | 1             | 0           | 2.989582                | 0.236034 | -1.709880 |
| 29            | 6             | 0           | 3.965354                | 0.912017 | 0.108620  |
| 30            | 6             | 0           | 3.852668                | 1.789175 | 1.173630  |
| 31            | 8             | 0           | 0.606111                | 5.150099 | -1.673586 |
| 32            | 8             | 0           | -0.606128               | 5.150077 | 1.673599  |
| 33            | 6             | 0           | 0.732693                | 6.039708 | -2.769308 |
| 34            | 1             | 0           | -0.081098               | 6.776880 | -2.792742 |
| 35            | 1             | 0           | 0.762724                | 5.505137 | -3.728231 |
| 36            | 1             | 0           | 1.681480                | 6.558777 | -2.620236 |
| 37            | 6             | 0           | -0.732719               | 6.039657 | 2.769350  |
| 38            | 1             | 0           | -0.762735               | 5.505057 | 3.728256  |

|    |   |   |            |           |           |
|----|---|---|------------|-----------|-----------|
| 39 | 1 | 0 | -1.681516  | 6.558712  | 2.620295  |
| 40 | 1 | 0 | 0.081062   | 6.776839  | 2.792799  |
| 41 | 1 | 0 | 5.922728   | -3.151574 | -1.085659 |
| 42 | 6 | 0 | 6.075921   | -2.149942 | -0.692955 |
| 43 | 6 | 0 | 6.429238   | 0.446350  | 0.337426  |
| 44 | 6 | 0 | 7.347363   | -1.712131 | -0.314489 |
| 45 | 6 | 0 | 4.988620   | -1.285986 | -0.552279 |
| 46 | 6 | 0 | 5.136773   | 0.015043  | -0.038466 |
| 47 | 6 | 0 | 7.514095   | -0.401418 | 0.204247  |
| 48 | 1 | 0 | 3.996820   | -1.637862 | -0.821709 |
| 49 | 1 | 0 | 6.562815   | 1.460471  | 0.706245  |
| 50 | 6 | 0 | 8.661276   | -2.336570 | -0.333516 |
| 51 | 6 | 0 | 9.594342   | -1.470250 | 0.140048  |
| 52 | 6 | 0 | 10.910055  | -2.094747 | 0.120411  |
| 53 | 6 | 0 | 13.104440  | -3.793907 | -0.157466 |
| 54 | 6 | 0 | 10.740643  | -3.406638 | -0.395901 |
| 55 | 6 | 0 | 12.178805  | -1.643257 | 0.493962  |
| 56 | 6 | 0 | 13.272313  | -2.503607 | 0.350413  |
| 57 | 6 | 0 | 11.831880  | -4.250836 | -0.533731 |
| 58 | 1 | 0 | 12.320583  | -0.641345 | 0.890141  |
| 59 | 1 | 0 | 14.263812  | -2.163156 | 0.637712  |
| 60 | 1 | 0 | 11.712372  | -5.257611 | -0.928281 |
| 61 | 1 | 0 | 13.964825  | -4.449408 | -0.262444 |
| 62 | 6 | 0 | 8.990224   | -0.136710 | 0.537325  |
| 63 | 6 | 0 | 9.265747   | -3.668939 | -0.732999 |
| 64 | 6 | 0 | 8.694873   | -4.833491 | 0.107767  |
| 65 | 1 | 0 | 7.623228   | -4.961464 | -0.083688 |
| 66 | 1 | 0 | 8.830776   | -4.648578 | 1.178041  |
| 67 | 1 | 0 | 9.197395   | -5.774614 | -0.143631 |
| 68 | 6 | 0 | 9.075702   | -3.955981 | -2.239843 |
| 69 | 1 | 0 | 9.484581   | -3.143593 | -2.848939 |
| 70 | 1 | 0 | 8.012387   | -4.063838 | -2.483083 |
| 71 | 1 | 0 | 9.582866   | -4.885351 | -2.523516 |
| 72 | 6 | 0 | 9.557929   | 1.025317  | -0.308986 |
| 73 | 1 | 0 | 9.420245   | 0.835870  | -1.378217 |
| 74 | 1 | 0 | 10.629767  | 1.155568  | -0.119994 |
| 75 | 1 | 0 | 9.054199   | 1.966567  | -0.060700 |
| 76 | 6 | 0 | 9.183162   | 0.155735  | 2.042627  |
| 77 | 1 | 0 | 8.676067   | 1.085969  | 2.323684  |
| 78 | 1 | 0 | 10.246828  | 0.265014  | 2.283716  |
| 79 | 1 | 0 | 8.775773   | -0.654597 | 2.655499  |
| 80 | 1 | 0 | -5.922715  | -3.151601 | 1.085598  |
| 81 | 6 | 0 | -6.075911  | -2.149963 | 0.692912  |
| 82 | 6 | 0 | -6.429234  | 0.446344  | -0.337429 |
| 83 | 6 | 0 | -7.347356  | -1.712143 | 0.314469  |
| 84 | 6 | 0 | -4.988609  | -1.286007 | 0.552233  |
| 85 | 6 | 0 | -5.136767  | 0.015029  | 0.038441  |
| 86 | 6 | 0 | -7.514092  | -0.401423 | -0.204248 |
| 87 | 1 | 0 | -3.996806  | -1.637889 | 0.821645  |
| 88 | 1 | 0 | -6.562813  | 1.460470  | -0.706234 |
| 89 | 6 | 0 | -8.661271  | -2.336579 | 0.333506  |
| 90 | 6 | 0 | -9.594342  | -1.470250 | -0.140032 |
| 91 | 6 | 0 | -10.910056 | -2.094744 | -0.120385 |
| 92 | 6 | 0 | -13.104442 | -3.793900 | 0.157502  |



|     |   |   |            |           |           |
|-----|---|---|------------|-----------|-----------|
| 93  | 6 | 0 | -10.740640 | -3.406643 | 0.395905  |
| 94  | 6 | 0 | -12.178810 | -1.643244 | -0.493910 |
| 95  | 6 | 0 | -13.272319 | -2.503593 | -0.350356 |
| 96  | 6 | 0 | -11.831877 | -4.250839 | 0.533740  |
| 97  | 1 | 0 | -12.320591 | -0.641326 | -0.890072 |
| 98  | 1 | 0 | -14.263821 | -2.163135 | -0.637634 |
| 99  | 1 | 0 | -11.712367 | -5.257620 | 0.928274  |
| 100 | 1 | 0 | -13.964827 | -4.449400 | 0.262483  |
| 101 | 6 | 0 | -8.990225  | -0.136707 | -0.537301 |
| 102 | 6 | 0 | -9.265739  | -3.668953 | 0.732976  |
| 103 | 6 | 0 | -8.694882  | -4.833491 | -0.107820 |
| 104 | 1 | 0 | -7.623234  | -4.961469 | 0.083614  |
| 105 | 1 | 0 | -8.830802  | -4.648558 | -1.178089 |
| 106 | 1 | 0 | -9.197402  | -5.774617 | 0.143568  |
| 107 | 6 | 0 | -9.075672  | -3.956023 | 2.239812  |
| 108 | 1 | 0 | -9.484538  | -3.143645 | 2.848929  |
| 109 | 1 | 0 | -8.012353  | -4.063888 | 2.483033  |
| 110 | 1 | 0 | -9.582834  | -4.885397 | 2.523476  |
| 111 | 6 | 0 | -9.557914  | 1.025314  | 0.309030  |
| 112 | 1 | 0 | -9.420215  | 0.835854  | 1.378257  |
| 113 | 1 | 0 | -10.629755 | 1.155570  | 0.120055  |
| 114 | 1 | 0 | -9.054185  | 1.966564  | 0.060747  |
| 115 | 6 | 0 | -9.183183  | 0.155755  | -2.042597 |
| 116 | 1 | 0 | -8.676089  | 1.085990  | -2.323652 |
| 117 | 1 | 0 | -10.246853 | 0.265040  | -2.283670 |
| 118 | 1 | 0 | -8.775805  | -0.654572 | -2.655483 |

**Table S4.** Optimized coordinates of a model compound **[(S)-6,6'-(COPV1)<sub>2</sub>-binaph]'** and in the S<sub>1</sub> state.

Total energy = -2545.6133841 a.u.

| Center Number | Atomic Number | Atomic Type | Coordinates (Angstroms) |          |           |
|---------------|---------------|-------------|-------------------------|----------|-----------|
|               |               |             | X                       | Y        | Z         |
| 1             | 1             | 0           | -1.475553               | 6.116922 | -3.209760 |
| 2             | 6             | 0           | -1.560410               | 5.363293 | -2.435481 |
| 3             | 1             | 0           | -3.476132               | 4.704681 | -3.112062 |
| 4             | 6             | 0           | -2.683657               | 4.570483 | -2.379608 |
| 5             | 6             | 0           | -0.616209               | 4.225276 | -0.488456 |
| 6             | 6             | 0           | -2.832994               | 3.577045 | -1.381213 |
| 7             | 6             | 0           | -0.522021               | 5.194292 | -1.484748 |
| 8             | 6             | 0           | -1.779579               | 3.403496 | -0.423451 |
| 9             | 6             | 0           | -3.986011               | 2.753874 | -1.315245 |
| 10            | 1             | 0           | -1.177786               | 2.254145 | 1.313514  |
| 11            | 6             | 0           | -4.138991               | 1.778251 | -0.344607 |
| 12            | 1             | 0           | -4.752815               | 2.886322 | -2.074718 |
| 13            | 6             | 0           | -3.085106               | 1.618293 | 0.604490  |
| 14            | 1             | 0           | -3.195691               | 0.878968 | 1.392763  |
| 15            | 6             | 0           | -1.954234               | 2.396802 | 0.569014  |
| 16            | 6             | 0           | 0.534303                | 4.902703 | 1.631357  |
| 17            | 6             | 0           | 0.497831                | 4.071199 | 0.496819  |

|    |   |   |           |           |           |
|----|---|---|-----------|-----------|-----------|
| 18 | 6 | 0 | 2.568837  | 3.851297  | 2.408532  |
| 19 | 6 | 0 | 1.519905  | 3.112907  | 0.311956  |
| 20 | 6 | 0 | 1.572153  | 4.784629  | 2.585695  |
| 21 | 6 | 0 | 2.584890  | 2.990058  | 1.274195  |
| 22 | 6 | 0 | 1.559203  | 2.231196  | -0.816601 |
| 23 | 1 | 0 | 1.589235  | 5.426450  | 3.458984  |
| 24 | 1 | 0 | 4.356101  | 1.949461  | 1.856646  |
| 25 | 1 | 0 | 3.364579  | 3.764524  | 3.144344  |
| 26 | 6 | 0 | 2.554827  | 1.305618  | -0.971305 |
| 27 | 1 | 0 | 0.780991  | 2.314558  | -1.567989 |
| 28 | 1 | 0 | 2.550788  | 0.688539  | -1.863701 |
| 29 | 6 | 0 | 3.626374  | 1.163502  | -0.027567 |
| 30 | 6 | 0 | 3.597121  | 2.035376  | 1.085073  |
| 31 | 8 | 0 | 0.616264  | 5.949663  | -1.485532 |
| 32 | 8 | 0 | -0.481823 | 5.800954  | 1.741376  |
| 33 | 6 | 0 | 0.783297  | 6.941695  | -2.484290 |
| 34 | 1 | 0 | 0.003656  | 7.713012  | -2.427361 |
| 35 | 1 | 0 | 0.789082  | 6.507837  | -3.493040 |
| 36 | 1 | 0 | 1.754699  | 7.398952  | -2.286745 |
| 37 | 6 | 0 | -0.517209 | 6.671226  | 2.861373  |
| 38 | 1 | 0 | -0.597242 | 6.114083  | 3.803966  |
| 39 | 1 | 0 | -1.409522 | 7.285664  | 2.729646  |
| 40 | 1 | 0 | 0.368175  | 7.319340  | 2.897322  |
| 41 | 1 | 0 | 5.322928  | -2.731615 | -1.926661 |
| 42 | 6 | 0 | 5.501030  | -1.885208 | -1.269077 |
| 43 | 6 | 0 | 5.932097  | 0.303228  | 0.476571  |
| 44 | 6 | 0 | 6.739890  | -1.754531 | -0.583028 |
| 45 | 6 | 0 | 4.517454  | -0.938634 | -1.085981 |
| 46 | 6 | 0 | 4.680810  | 0.187836  | -0.213815 |
| 47 | 6 | 0 | 6.925190  | -0.622093 | 0.298288  |
| 48 | 1 | 0 | 3.567908  | -1.077890 | -1.592174 |
| 49 | 1 | 0 | 6.107731  | 1.163600  | 1.115866  |
| 50 | 6 | 0 | 7.923384  | -2.519849 | -0.554097 |
| 51 | 6 | 0 | 8.865710  | -1.923800 | 0.304091  |
| 52 | 6 | 0 | 10.058535 | -2.695895 | 0.328772  |
| 53 | 6 | 0 | 12.092809 | -4.592443 | -0.035329 |
| 54 | 6 | 0 | 9.866611  | -3.822255 | -0.545112 |
| 55 | 6 | 0 | 11.288960 | -2.546367 | 1.011204  |
| 56 | 6 | 0 | 12.287047 | -3.494534 | 0.820210  |
| 57 | 6 | 0 | 10.874528 | -4.752791 | -0.719636 |
| 58 | 1 | 0 | 11.453270 | -1.702544 | 1.675929  |
| 59 | 1 | 0 | 13.235209 | -3.386089 | 1.341387  |
| 60 | 1 | 0 | 10.734408 | -5.606494 | -1.379852 |
| 61 | 1 | 0 | 12.887804 | -5.321006 | -0.168474 |
| 62 | 6 | 0 | 8.329277  | -0.652505 | 0.929458  |
| 63 | 6 | 0 | 8.467514  | -3.790128 | -1.180806 |
| 64 | 6 | 0 | 7.638372  | -5.033622 | -0.781081 |
| 65 | 1 | 0 | 6.620169  | -4.967591 | -1.182415 |
| 66 | 1 | 0 | 7.570953  | -5.126334 | 0.307395  |
| 67 | 1 | 0 | 8.098620  | -5.947905 | -1.174371 |
| 68 | 6 | 0 | 8.550868  | -3.687007 | -2.722160 |
| 69 | 1 | 0 | 9.137059  | -2.813916 | -3.025504 |
| 70 | 1 | 0 | 7.550065  | -3.596119 | -3.160618 |
| 71 | 1 | 0 | 9.025323  | -4.580961 | -3.144260 |

|     |   |   |            |           |           |
|-----|---|---|------------|-----------|-----------|
| 72  | 6 | 0 | 9.159074   | 0.589585  | 0.523387  |
| 73  | 1 | 0 | 9.219837   | 0.680619  | -0.565548 |
| 74  | 1 | 0 | 10.179294  | 0.521960  | 0.918803  |
| 75  | 1 | 0 | 8.702226   | 1.505594  | 0.917764  |
| 76  | 6 | 0 | 8.251954   | -0.748996 | 2.472197  |
| 77  | 1 | 0 | 7.780374   | 0.148145  | 2.891994  |
| 78  | 1 | 0 | 9.253998   | -0.840222 | 2.907312  |
| 79  | 1 | 0 | 7.664524   | -1.619178 | 2.781257  |
| 80  | 1 | 0 | -8.728539  | 1.082062  | -0.820297 |
| 81  | 6 | 0 | -7.764169  | 0.647199  | -0.571595 |
| 82  | 6 | 0 | -5.251564  | -0.436127 | 0.094047  |
| 83  | 6 | 0 | -7.654971  | -0.694932 | -0.197762 |
| 84  | 6 | 0 | -6.615575  | 1.438520  | -0.609585 |
| 85  | 6 | 0 | -5.347498  | 0.922026  | -0.286037 |
| 86  | 6 | 0 | -6.383562  | -1.230221 | 0.136554  |
| 87  | 1 | 0 | -6.704952  | 2.489385  | -0.869962 |
| 88  | 1 | 0 | -4.275767  | -0.856589 | 0.324902  |
| 89  | 6 | 0 | -8.623927  | -1.770553 | -0.058458 |
| 90  | 6 | 0 | -7.998601  | -2.911116 | 0.334402  |
| 91  | 6 | 0 | -8.967922  | -3.989209 | 0.471592  |
| 92  | 6 | 0 | -11.244227 | -5.599019 | 0.552083  |
| 93  | 6 | 0 | -10.239377 | -3.450929 | 0.139614  |
| 94  | 6 | 0 | -8.846109  | -5.331445 | 0.841733  |
| 95  | 6 | 0 | -9.994054  | -6.129650 | 0.878719  |
| 96  | 6 | 0 | -11.370559 | -4.251696 | 0.179898  |
| 97  | 1 | 0 | -7.878433  | -5.754378 | 1.097767  |
| 98  | 1 | 0 | -9.911328  | -7.174937 | 1.165093  |
| 99  | 1 | 0 | -12.348997 | -3.848711 | -0.072650 |
| 100 | 1 | 0 | -12.125957 | -6.233326 | 0.586053  |
| 101 | 6 | 0 | -6.504034  | -2.716456 | 0.505695  |
| 102 | 6 | 0 | -10.117885 | -1.966063 | -0.232097 |
| 103 | 6 | 0 | -10.929864 | -1.075491 | 0.735641  |
| 104 | 1 | 0 | -10.773998 | -0.014287 | 0.509697  |
| 105 | 1 | 0 | -10.631834 | -1.250819 | 1.774186  |
| 106 | 1 | 0 | -12.002005 | -1.285445 | 0.647003  |
| 107 | 6 | 0 | -10.563563 | -1.713246 | -1.690399 |
| 108 | 1 | 0 | -10.003575 | -2.344998 | -2.387137 |
| 109 | 1 | 0 | -10.399240 | -0.666300 | -1.970427 |
| 110 | 1 | 0 | -11.630753 | -1.931659 | -1.812174 |
| 111 | 6 | 0 | -5.694513  | -3.605008 | -0.466002 |
| 112 | 1 | 0 | -5.995308  | -3.427581 | -1.503385 |
| 113 | 1 | 0 | -5.849909  | -4.666579 | -0.241693 |
| 114 | 1 | 0 | -4.622247  | -3.395087 | -0.379883 |
| 115 | 6 | 0 | -6.054624  | -2.971867 | 1.962340  |
| 116 | 1 | 0 | -4.987028  | -2.754056 | 2.081424  |
| 117 | 1 | 0 | -6.218325  | -4.019194 | 2.241054  |
| 118 | 1 | 0 | -6.612600  | -2.341273 | 2.661791  |

---

**poly-[(S)-3,3'-COPV1-bInaph]**

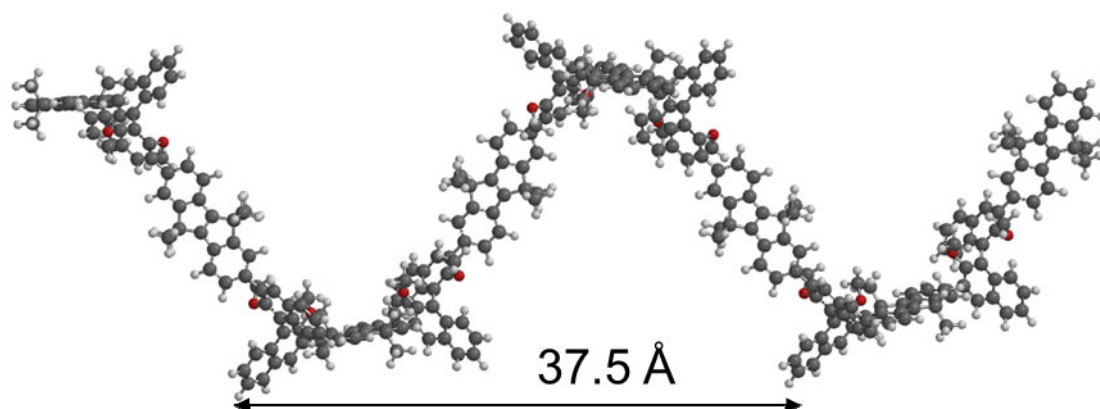

**poly-[(S)-6,6'-COPV1-bInaph]**

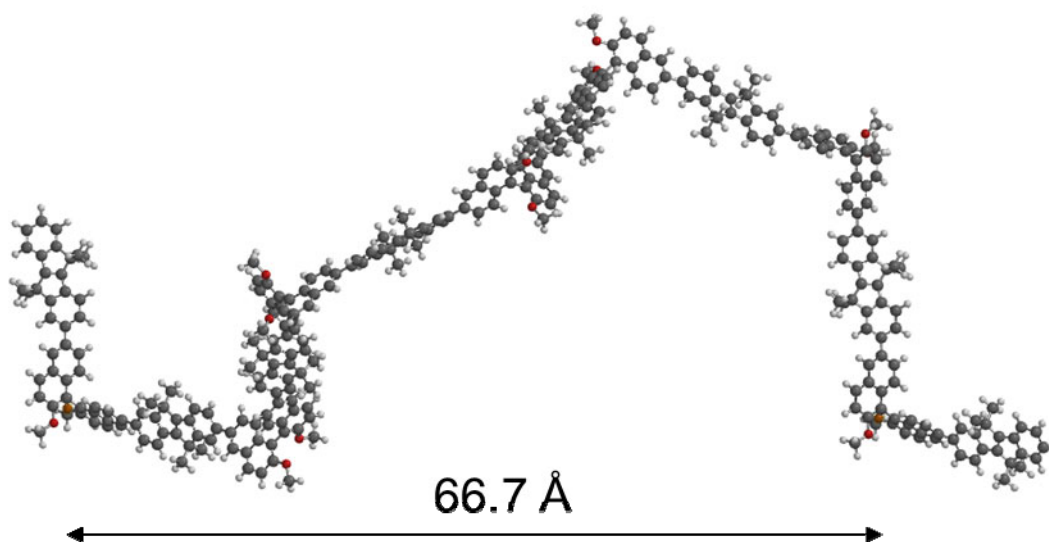

**Figure S16.** One of the possible structures of polymers generated based on the structures of model monomers (optimized using MMFF calculations). The values of pitch of the helix are also shown.
